# Supplementary material for: Whole-genome sequencing for prediction of Mycobacterium tuberculosis drug susceptibility and resistance: a retrospective cohort study
Source: PubMed Central journal article supplement (PMC4579482; doi:10.1016/s1473-3099(15)00062-6), 2015-10
Supplement: mmc1.pdf [file mmc1.pdf]

## Supplementary webappendix 1

This webappendix formed part of the original submission and has been peer reviewed. We post it as supplied by the authors.

Supplement to: Walker TM, Kohl TA, Omar SV, et al. Whole-genome sequencing for prediction of *Mycobacterium tuberculosis* drug susceptibility and resistance: a retrospective cohort study. *Lancet Infect Dis* 2015; published online June 24. [http://dx.doi.org/10.1016/S1473-3099\(15\)00062-6](http://dx.doi.org/10.1016/S1473-3099(15)00062-6).

## Supplementary material

### **Table of Contents**

|                   |           |
|-------------------|-----------|
| <b>S1</b>         | <b>2</b>  |
| <b>S2</b>         | <b>3</b>  |
| <b>S3</b>         | <b>3</b>  |
| <b>S4</b>         | <b>5</b>  |
| <b>S5</b>         | <b>8</b>  |
| <b>S6</b>         | <b>10</b> |
| S6.1              | 12        |
| <b>S7</b>         | <b>14</b> |
| <b>S8</b>         | <b>15</b> |
| S8.1              | 18        |
| <b>S9</b>         | <b>22</b> |
| <b>S10</b>        | <b>24</b> |
| <b>S11</b>        | <b>26</b> |
| <b>S12</b>        | <b>29</b> |
| <b>S13</b>        | <b>31</b> |
| <b>S14</b>        | <b>32</b> |
| <b>S15</b>        | <b>37</b> |
| <b>S16</b>        | <b>39</b> |
| <b>S17</b>        | <b>40</b> |
| <b>References</b> | <b>41</b> |

## S1

Samples were selected from different and cosmopolitan sources, ensuring representation of all global clades seen here in a maximum likelihood tree of all 3651 samples. The tree was built from full genome sequences for which nucleotide null-calls at invariant sites were substituted with the reference nucleotide.

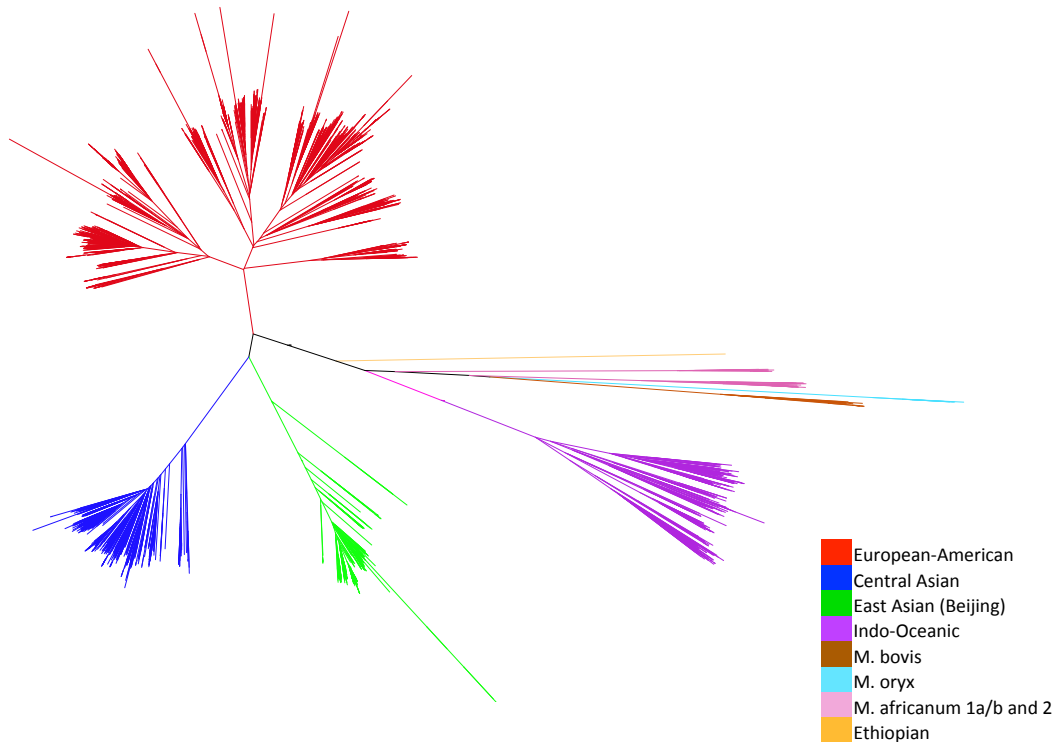

For the original training-set, all isolates sequenced for population studies of Birmingham (2009-2013, unpublished) and Oxfordshire (2007-2012)<sup>1</sup> were selected. Samples sequenced for a study on tuberculosis transmission<sup>2</sup> were also selected, as were all samples phenotypically resistant to isoniazid, or mono-resistant to rifampicin, and stored at the Public Health Laboratory for the Midlands. Samples from Sierra Leone were selected from a study of re-treated smear-positive cases in Kenema district, 2003-2004.<sup>3</sup> Samples from South Africa were sequenced as part of a survey of drug resistance in the country. All phenotypically resistant isolates that were available at the time of asking were contributed first to the training-set and then at a later date to the validation-set, in each case with matched susceptible controls. For the original validation-set, samples were additionally obtained from a population study of Hamburg, Germany (2005-2012) and from a drug-resistance survey of Nukus, Uzbekistan (2001-2006).

NB: The tree gave rise to a small number of unexpectedly long branches. On closer examination this was identified as a consequence of missing data and / or contamination affecting the 16s and 23s genes in a small number of samples. The analysis was re-run without these samples without any material difference to the results.

## S2

Sample selection and penotyping. Samples were excluded if they had either no available phenotypic data or where less than 88% of nucleotides in the reference genome were called.

| Training-set                   | Identified | Included |
|--------------------------------|------------|----------|
| Midlands, UK (unselected)      | 1162       | 1122     |
| Midlands, UK (outbreaks)       | 428        | 412      |
| Midlands, UK (resistance)      | 95         | 94       |
| Oxfordshire, UK (unselected)   | 389        | 338      |
| Gauteng province, South Africa | 80         | 54       |
| Kenema district, Sierra Leone  | 80         | 79       |
| Total                          | 2234       | 2099     |

| Validation-set                 | Identified | Included |
|--------------------------------|------------|----------|
| Hamburg, Germany               | 942        | 841      |
| Nukus, Uzbekistan              | 277        | 261      |
| Gauteng province, South Africa | 466        | 450      |
| Total                          | 1685       | 1552     |

Phenotypic drug-susceptibility testing was performed at different mycobacterial reference laboratories. UK samples from the Midlands underwent phenotypic testing at the Public Health Laboratory for the Midlands in Birmingham, and Oxfordshire samples were tested at the National Mycobacterial Reference Laboratory in London, all as part of routine patient care. Samples from Sierra Leone, Uzbekistan and Germany were tested at the Forschungszentrum Borstel, Germany, and samples from South Africa at the National Institute for Communicable Diseases, Johannesburg, all as part of research projects.

## S3

The 23 candidate-genes were identified in a review of the published literature by SF and SN, who used their expert opinion / judgement to compile a list of high-confidence resistance-determining mutations. This was done prior and hence independent of this study. These were nevertheless taken as a starting point for our study. Genes are listed below together with the unique Pubmed identifiers for the source papers. Each gene was included on the basis of at least one plausible resistance-determining mutation. The publications linked to the pubmed identifiers are listed below the table.

| Genes | Pubmed uid |          |          |         |          |          |          |  |
|-------|------------|----------|----------|---------|----------|----------|----------|--|
| aphC  | 22646308   | 12654653 |          |         |          |          |          |  |
| eis   | 21300839   |          |          |         |          |          |          |  |
| embA  | 20427375   | 10639358 |          |         |          |          |          |  |
| embB  | 20427375   | 10639358 | 21300839 | 9257740 | 11854934 | 16641474 | 22646308 |  |
| embC  | 20427375   |          |          |         |          |          |          |  |
| embR  | 10639358   |          |          |         |          |          |          |  |
| fabG1 | 21300839   | 19494067 |          |         |          |          |          |  |
| gidB  | 22646308   |          |          |         |          |          |          |  |
| gyrA  | 19687244   | 21300839 | 21562102 |         |          |          |          |  |
| gyrB  | 19470506   | 17412727 | 19721073 |         |          |          |          |  |
| inhA  | 21110864   |          |          |         |          |          |          |  |
| iniA  | 10639358   |          |          |         |          |          |          |  |
| iniC  | 10639358   |          |          |         |          |          |          |  |
| katG  | 9210694    | 21300839 | 22646308 |         |          |          |          |  |

|      |          |          |          |          |          |          |          |          |
|------|----------|----------|----------|----------|----------|----------|----------|----------|
| manB | 10639358 |          |          |          |          |          |          |          |
| ndh  | 11408244 |          |          |          |          |          |          |          |
| pncA | 22646308 | 21300839 | 16848344 | 15616332 | 11641519 | 10681313 | 9692180  | 9056006  |
|      | 9055989  | 8640557  |          |          |          |          |          |          |
| rmlD | 10639358 |          |          |          |          |          |          |          |
| rpoB | 11136757 | 7759399  | 8027320  | 8913484  | 9003625  | 10565894 | 10921994 | 14729930 |
|      | 15184414 | 15814606 | 16229229 | 16672384 | 19721079 | 21300839 | 22646308 |          |
| rpsA | 21835980 |          |          |          |          |          |          |          |
| rpsL | 8849220  | 22646308 |          |          |          |          |          |          |
| rrs  | 21300839 | 21562102 |          |          |          |          |          |          |
| tlyA | 16048924 |          |          |          |          |          |          |          |

- 7759399 [Bodmer et al, Mutation position and type of substitution in the beta-subunit of the RNA polymerase influence in-vitro activity of rifamycins in rifampicin-resistant Mycobacterium tuberculosis. J Antimicrob Chemother. 1995 Feb;35\(2\):345-8.](#)
- 8027320 [Kapur et al, Characterization by automated DNA sequencing of mutations in the gene \(rpoB\) encoding the RNA polymerase beta subunit in rifampin-resistant Mycobacterium tuberculosis strains from New York City and Texas, J Clin Microbiol. 1994 Apr;32\(4\):1095-8.](#)
- 8640557 [Scorpio et al, Mutations in pncA, a gene encoding pyrazinamidase/nicotinamidase, cause resistance to the antituberculous drug pyrazinamide in tubercle bacillus, Nat Med. 1996 Jun;2\(6\):662-7.](#)
- 8849220 [Sreevatsan et al, Characterization of rpsL and rrs mutations in streptomycin-resistant Mycobacterium tuberculosis isolates from diverse geographic localities. Antimicrob Agents Chemother. 1996 Apr;40\(4\):1024-6.](#)
- 8913484 [Moghazeh et al, Comparative antimycobacterial activities of rifampin, rifapentine, and KRM-1648 against a collection of rifampin-resistant Mycobacterium tuberculosis isolates with known rpoB mutations. Antimicrob Agents Chemother. 1996 Nov;40\(11\):2655-7.](#)
- 9003625 [Kim et al, Mutations in the rpoB gene of Mycobacterium tuberculosis that interfere with PCR-single-strand conformation polymorphism analysis for rifampin susceptibility testing. J Clin Microbiol. 1997 Feb;35\(2\):492-4.](#)
- 9055989 [Scorpio et al, Characterization of pncA mutations in pyrazinamide-resistant Mycobacterium tuberculosis. Antimicrob Agents Chemother. 1997 Mar;41\(3\):540-3.](#)
- 9056006 [Sreevatsan et al, Mutations associated with pyrazinamide resistance in pncA of Mycobacterium tuberculosis complex organisms. Antimicrob Agents Chemother. 1997 Mar;41\(3\):636-40.](#)
- 9210694 [Haas et al, Molecular analysis of katG gene mutations in strains of Mycobacterium tuberculosis complex from Africa. Antimicrob Agents Chemother. 1997 Jul;41\(7\):1601-3.](#)
- 9257740 [Sreevatsan et al, Ethambutol resistance in Mycobacterium tuberculosis: critical role of embB mutations. Antimicrob Agents Chemother. 1997 Aug;41\(8\):1677-81.](#)
- 9692180 [Hirano et al, Mutation in pncA is a major mechanism of pyrazinamide resistance in Mycobacterium tuberculosis. Tuber Lung Dis. 1997;78\(2\):117-22.](#)
- 10565894 [Yuen et al, Bacteriological and molecular analysis of rifampin-resistant Mycobacterium tuberculosis strains isolated in Australia. J Clin Microbiol. 1999 Dec;37\(12\):3844-50.](#)
- 10639358 [Ramaswamy et al, Molecular genetic analysis of nucleotide polymorphisms associated with ethambutol resistance in human isolates of Mycobacterium tuberculosis. Antimicrob Agents Chemother. 2000 Feb;44\(2\):326-36.](#)
- 10681313 [Cheng et al, pncA mutations as a major mechanism of pyrazinamide resistance in Mycobacterium tuberculosis: spread of a monoresistant strain in Quebec, Canada. Antimicrob Agents Chemother. 2000 Mar;44\(3\):528-32.](#)
- 10921994 [Valim et al, Mutations in the rpoB gene of multidrug-resistant Mycobacterium tuberculosis isolates from Brazil. J Clin Microbiol. 2000 Aug;38\(8\):3119-22.](#)
- 11136757 [Heep et al, Frequency of rpoB mutations inside and outside the cluster I region in rifampin-resistant clinical Mycobacterium tuberculosis isolates. J Clin Microbiol. 2001 Jan;39\(1\):107-10.](#)
- 11408244 [Lee et al, Novel mutations in ndh in isoniazid-resistant Mycobacterium tuberculosis isolates. Antimicrob Agents Chemother. 2001 Jul;45\(7\):2157-9.](#)
- 11641519 [Lee et al, Characterization of pncA mutations of pyrazinamide-resistant Mycobacterium tuberculosis in Korea. J Korean Med Sci. 2001 Oct;16\(5\):537-43.](#)
- 11854934 [Lee et al, Mutations in the embB locus among Korean clinical isolates of Mycobacterium tuberculosis resistant to ethambutol. Yonsei Med J. 2002 Feb;43\(1\):59-64.](#)
- 12654653 [Ramaswamy et al, Single nucleotide polymorphisms in genes associated with isoniazid resistance in Mycobacterium tuberculosis. Antimicrob Agents Chemother. 2003 Apr;47\(4\):1241-50.](#)
- 14729930 [Ramaswamy et al, Genotypic analysis of multidrug-resistant Mycobacterium tuberculosis isolates from Monterrey, Mexico. J Med Microbiol. 2004 Feb;53\(Pt 2\):107-13.](#)
- 15184414 [Sajduda et al, Molecular characterization of rifampin- and isoniazid-resistant Mycobacterium tuberculosis strains isolated in Poland. J Clin Microbiol. 2004 Jun;42\(6\):2425-31.](#)
- 15616332 [Rodrigues et al, Characterization of pncA mutations in pyrazinamide-resistant Mycobacterium tuberculosis in Brazil. Antimicrob Agents Chemother. 2005 Jan;49\(1\):444-6.](#)
- 15814606 [O'Sullivan et al, Analysis of rpoB and pncA mutations in the published literature: an insight into the role of oxidative stress in Mycobacterium tuberculosis evolution? J Antimicrob Chemother. 2005 May;55\(5\):674-9.](#)
- 16048924 [Maus et al, Molecular analysis of cross-resistance to capreomycin, kanamycin, amikacin, and viomycin in Mycobacterium](#)

tuberculosis. *Antimicrob Agents Chemother.* 2005 Aug;49(8):3192-7.

16229229 [Hillemann et al, Rifampicin and isoniazid resistance mutations in Mycobacterium tuberculosis strains isolated from patients in Kazakhstan. \*Int J Tuberc Lung Dis.\* 2005 Oct;9\(10\):1161-7.](#)

16641474 [Plinke et al, Significance of mutations in embB codon 306 for prediction of ethambutol resistance in clinical Mycobacterium tuberculosis isolates. \*Antimicrob Agents Chemother.\* 2006 May;50\(5\):1900-2.](#)

16672384 [Park et al, Comparison of a conventional antimicrobial susceptibility assay to an oligonucleotide chip system for detection of drug resistance in Mycobacterium tuberculosis isolates. \*J Clin Microbiol.\* 2006 May;44\(5\):1619-24.](#)

16848344 [Iouw et al, Frequency and implications of pyrazinamide resistance in managing previously treated tuberculosis patients. \*Int J Tuberc Lung Dis.\* 2006 Jul;10\(7\):802-7.](#)

17412727 [Wang et al, Fluoroquinolone resistance in Mycobacterium tuberculosis isolates: associated genetic mutations and relationship to antimicrobial exposure. \*J Antimicrob Chemother.\* 2007 May;59\(5\):860-5. Epub 2007 Apr 5.](#)

19470506 [Feuerriegel et al, Sequence analyses of just four genes to detect extensively drug-resistant Mycobacterium tuberculosis strains in multidrug-resistant tuberculosis patients undergoing treatment. \*Antimicrob Agents Chemother.\* 2009 Aug;53\(8\):3353-6. doi: 10.1128/AAC.00050-09. Epub 2009 May 26.](#)

19687244 [Von Groll et al, Fluoroquinolone resistance in Mycobacterium tuberculosis and mutations in gyrA and gyrB. \*Antimicrob Agents Chemother.\* 2009 Oct;53\(10\):4498-500. doi: 10.1128/AAC.00287-09. Epub 2009 Aug 17.](#)

19721073 [Duong et al, Beijing genotype of Mycobacterium tuberculosis is significantly associated with high-level fluoroquinolone resistance in Vietnam. \*Antimicrob Agents Chemother.\* 2009 Nov;53\(11\):4835-9. doi: 10.1128/AAC.00541-09. Epub 2009 Aug 31.](#)

19721079 [Bahrmand et al, High-level rifampin resistance correlates with multiple mutations in the rpoB gene of pulmonary tuberculosis isolates from the Afghanistan border of Iran. \*J Clin Microbiol.\* 2009 Sep;47\(9\):2744-50. doi: 10.1128/JCM.r00548-09.](#)

20427375 [Plinke et al, embCAB sequence variation among ethambutol-resistant Mycobacterium tuberculosis isolates without embB306 mutation. \*J Antimicrob Chemother.\* 2010 Jul;65\(7\):1359-67. doi: 10.1093/jac/dkq120. Epub 2010 Apr 28.](#)

21110864 [Loerger et al, The non-clonality of drug resistance in Beijing-genotype isolates of Mycobacterium tuberculosis from the Western Cape of South Africa. \*BMC Genomics.\* 2010 Nov 26;11:670. doi: 10.1186/1471-2164-11-670](#)

21300839 [Campbell et al, Molecular detection of mutations associated with first- and second-line drug resistance compared with conventional drug susceptibility testing of Mycobacterium tuberculosis. \*Antimicrob Agents Chemother.\* 2011 May;55\(5\):2032-41. doi: 10.1128/AAC.01550-10. Epub 2011 Feb 7.](#)

21300839 [Campbell et al, Molecular detection of mutations associated with first- and second-line drug resistance compared with conventional drug susceptibility testing of Mycobacterium tuberculosis. \*Antimicrob Agents Chemother.\* 2011 May;55\(5\):2032-41. doi: 10.1128/AAC.01550-10. Epub 2011 Feb 7.](#)

21562102 [Huang et al, Performance assessment of the GenoType MTBDRsl test and DNA sequencing for detection of second-line and ethambutol drug resistance among patients infected with multidrug-resistant Mycobacterium tuberculosis. \*J Clin Microbiol.\* 2011 Jul;49\(7\):2502-8. doi: 10.1128/JCM.00197-11. Epub 2011 May 11.](#)

21835980 [Shi et al, Pyrazinamide inhibits trans-translation in Mycobacterium tuberculosis. \*Science.\* 2011 Sep 16;333\(6049\):1630-2. doi: 10.1126/science.1208813. Epub 2011 Aug 11.](#)

22646308 [Feuerriegel et al, Sequence analysis for detection of first-line drug resistance in Mycobacterium tuberculosis strains from a high-incidence setting. \*BMC Microbiol.\* 2012 May 30;12:90. doi: 10.1186/1471-2180-12-90.](#)

## S4

100 iterations of the algorithm, each time randomly assigning 1825 sequences to a training-set and 1826 to a validation-set. Genotypic predictions for the phenotypes in each of the 100 validation-sets are shown. As in table 1, algorithmic characterisations are based on: R (resistance-determining mutation); Rx (resistance-determinant as a mixed base-call); S<sub>0</sub> (zero mutations present); S<sub>s</sub> (only benign mutations present); U (uncharacterised mutation present in the absence of a resistance-determining mutation).

| Phenotypically Resistant |                |                |                |     | Phenotypically Sensitive |                |                |                |     |                           |             |
|--------------------------|----------------|----------------|----------------|-----|--------------------------|----------------|----------------|----------------|-----|---------------------------|-------------|
| Genotype                 |                |                |                |     | Genotype                 |                |                |                |     | Excluding uncharacterised |             |
| R                        | R <sub>x</sub> | S <sub>0</sub> | S <sub>s</sub> | U   | R                        | R <sub>x</sub> | S <sub>0</sub> | S <sub>s</sub> | U   | Sensitivity               | Specificity |
| 786                      | 30             | 53             | 27             | 98  | 143                      | 9              | 6754           | 565            | 591 | 91*07                     | 97*97       |
| 786                      | 37             | 46             | 14             | 95  | 130                      | 12             | 6842           | 504            | 565 | 93*20                     | 98*10       |
| 877                      | 38             | 52             | 14             | 106 | 147                      | 9              | 6754           | 536            | 558 | 93*27                     | 97*90       |
| 807                      | 37             | 56             | 8              | 106 | 129                      | 14             | 6789           | 531            | 540 | 92*95                     | 98*08       |
| 783                      | 42             | 54             | 18             | 92  | 125                      | 38             | 6804           | 487            | 606 | 91*97                     | 97*81       |
| 776                      | 36             | 44             | 12             | 86  | 131                      | 12             | 6780           | 559            | 594 | 93*55                     | 98*09       |
| 878                      | 44             | 50             | 13             | 97  | 135                      | 7              | 6708           | 534            | 535 | 93*60                     | 98*08       |
| 848                      | 46             | 59             | 11             | 88  | 102                      | 14             | 6744           | 546            | 593 | 92*74                     | 98*43       |
| 817                      | 32             | 56             | 17             | 85  | 124                      | 10             | 6783           | 570            | 545 | 92*08                     | 98*21       |

|     |    |    |    |     |     |    |      |     |     |       |       |
|-----|----|----|----|-----|-----|----|------|-----|-----|-------|-------|
| 843 | 39 | 59 | 12 | 97  | 128 | 10 | 6837 | 569 | 503 | 92-55 | 98-17 |
| 850 | 40 | 43 | 13 | 92  | 130 | 12 | 6810 | 510 | 564 | 94-08 | 98-10 |
| 835 | 42 | 53 | 18 | 90  | 118 | 10 | 6746 | 562 | 574 | 92-51 | 98-28 |
| 796 | 36 | 50 | 13 | 100 | 115 | 10 | 6722 | 582 | 558 | 92-96 | 98-32 |
| 828 | 38 | 61 | 18 | 88  | 112 | 6  | 6792 | 552 | 571 | 91-64 | 98-42 |
| 884 | 42 | 58 | 15 | 104 | 129 | 9  | 6762 | 569 | 506 | 92-69 | 98-15 |
| 843 | 35 | 59 | 7  | 130 | 134 | 10 | 6733 | 528 | 628 | 93-01 | 98-06 |
| 882 | 39 | 57 | 16 | 106 | 107 | 10 | 6744 | 531 | 562 | 92-66 | 98-42 |
| 883 | 41 | 37 | 12 | 100 | 114 | 12 | 6791 | 556 | 535 | 94-96 | 98-31 |
| 820 | 42 | 58 | 13 | 93  | 139 | 11 | 6775 | 519 | 595 | 92-39 | 97-98 |
| 850 | 32 | 66 | 22 | 109 | 131 | 15 | 6746 | 590 | 532 | 90-93 | 98-05 |
| 829 | 47 | 65 | 18 | 93  | 124 | 15 | 6738 | 536 | 585 | 91-35 | 98-12 |
| 814 | 31 | 59 | 10 | 97  | 146 | 8  | 6763 | 566 | 568 | 92-45 | 97-94 |
| 812 | 38 | 48 | 12 | 92  | 135 | 7  | 6774 | 544 | 558 | 93-41 | 98-10 |
| 836 | 43 | 58 | 10 | 115 | 122 | 8  | 6743 | 514 | 601 | 92-82 | 98-24 |
| 843 | 33 | 50 | 18 | 87  | 144 | 30 | 6768 | 557 | 517 | 92-80 | 97-68 |
| 822 | 37 | 54 | 18 | 126 | 122 | 13 | 6753 | 605 | 467 | 92-27 | 98-20 |
| 836 | 37 | 60 | 14 | 102 | 133 | 8  | 6837 | 558 | 586 | 92-19 | 98-13 |
| 816 | 37 | 53 | 11 | 112 | 112 | 11 | 6788 | 511 | 617 | 93-02 | 98-34 |
| 846 | 38 | 52 | 19 | 98  | 112 | 12 | 6776 | 582 | 571 | 92-57 | 98-34 |
| 794 | 39 | 58 | 22 | 90  | 116 | 13 | 6722 | 513 | 622 | 91-24 | 98-25 |
| 827 | 33 | 59 | 16 | 88  | 124 | 12 | 6756 | 548 | 534 | 91-98 | 98-17 |
| 702 | 29 | 57 | 18 | 95  | 116 | 11 | 6872 | 542 | 578 | 90-69 | 98-32 |
| 859 | 36 | 65 | 20 | 79  | 122 | 10 | 6705 | 587 | 540 | 91-33 | 98-22 |
| 846 | 40 | 58 | 22 | 118 | 134 | 9  | 6764 | 526 | 573 | 91-72 | 98-08 |
| 815 | 43 | 39 | 25 | 97  | 107 | 11 | 6784 | 526 | 571 | 93-06 | 98-41 |
| 776 | 34 | 56 | 17 | 91  | 125 | 11 | 6826 | 541 | 583 | 91-73 | 98-19 |
| 865 | 40 | 58 | 15 | 94  | 133 | 9  | 6760 | 563 | 548 | 92-54 | 98-10 |
| 830 | 40 | 57 | 16 | 112 | 120 | 12 | 6782 | 518 | 548 | 92-26 | 98-22 |
| 805 | 38 | 58 | 12 | 90  | 130 | 9  | 6858 | 582 | 520 | 92-33 | 98-17 |
| 844 | 39 | 49 | 22 | 103 | 133 | 14 | 6721 | 549 | 556 | 92-56 | 98-02 |
| 851 | 41 | 52 | 22 | 96  | 131 | 10 | 6703 | 536 | 590 | 92-34 | 98-09 |
| 815 | 42 | 62 | 10 | 104 | 152 | 9  | 6797 | 504 | 582 | 92-25 | 97-84 |
| 851 | 50 | 63 | 28 | 102 | 133 | 10 | 6750 | 523 | 584 | 90-83 | 98-07 |
| 849 | 39 | 60 | 16 | 104 | 132 | 8  | 6787 | 536 | 559 | 92-12 | 98-12 |
| 928 | 40 | 45 | 16 | 99  | 139 | 8  | 6685 | 614 | 501 | 94-07 | 98-03 |
| 838 | 39 | 51 | 10 | 105 | 112 | 5  | 6767 | 519 | 581 | 93-50 | 98-42 |
| 829 | 38 | 61 | 18 | 85  | 120 | 11 | 6804 | 514 | 533 | 91-65 | 98-24 |
| 829 | 38 | 44 | 16 | 111 | 133 | 11 | 6714 | 613 | 568 | 93-53 | 98-07 |
| 842 | 37 | 56 | 13 | 104 | 121 | 6  | 6734 | 531 | 600 | 92-72 | 98-28 |
| 835 | 48 | 61 | 12 | 106 | 127 | 12 | 6721 | 558 | 567 | 92-36 | 98-13 |
| 811 | 34 | 49 | 19 | 105 | 112 | 9  | 6827 | 538 | 536 | 92-55 | 98-38 |
| 884 | 44 | 48 | 18 | 104 | 118 | 10 | 6669 | 560 | 615 | 93-36 | 98-26 |
| 827 | 35 | 58 | 14 | 79  | 137 | 12 | 6807 | 514 | 564 | 92-29 | 98-01 |
| 860 | 37 | 60 | 16 | 122 | 122 | 8  | 6774 | 565 | 535 | 92-19 | 98-26 |
| 807 | 41 | 65 | 13 | 97  | 146 | 12 | 6793 | 559 | 559 | 91-58 | 97-90 |

|     |    |    |    |     |     |    |      |     |     |       |       |
|-----|----|----|----|-----|-----|----|------|-----|-----|-------|-------|
| 844 | 45 | 48 | 19 | 104 | 133 | 9  | 6775 | 551 | 482 | 92-99 | 98-10 |
| 839 | 48 | 49 | 15 | 107 | 132 | 11 | 6729 | 542 | 577 | 93-27 | 98-07 |
| 838 | 42 | 48 | 14 | 81  | 139 | 31 | 6754 | 508 | 565 | 93-42 | 97-71 |
| 836 | 47 | 42 | 9  | 95  | 136 | 14 | 6788 | 581 | 511 | 94-54 | 98-01 |
| 872 | 31 | 50 | 17 | 109 | 139 | 5  | 6779 | 552 | 524 | 93-09 | 98-07 |
| 830 | 40 | 47 | 17 | 108 | 141 | 6  | 6734 | 621 | 524 | 93-15 | 98-04 |
| 845 | 36 | 60 | 20 | 107 | 125 | 13 | 6753 | 596 | 527 | 91-68 | 98-16 |
| 844 | 35 | 59 | 21 | 87  | 119 | 11 | 6791 | 520 | 558 | 91-66 | 98-25 |
| 872 | 42 | 57 | 24 | 91  | 128 | 11 | 6758 | 542 | 557 | 91-86 | 98-13 |
| 875 | 35 | 60 | 14 | 88  | 128 | 11 | 6792 | 512 | 616 | 92-48 | 98-13 |
| 782 | 39 | 51 | 14 | 98  | 119 | 6  | 6742 | 524 | 563 | 92-66 | 98-31 |
| 781 | 33 | 65 | 17 | 109 | 123 | 8  | 6817 | 578 | 554 | 90-85 | 98-26 |
| 887 | 41 | 48 | 12 | 105 | 124 | 10 | 6728 | 551 | 539 | 93-93 | 98-19 |
| 823 | 32 | 56 | 12 | 99  | 113 | 13 | 6779 | 535 | 532 | 92-63 | 98-31 |
| 878 | 38 | 57 | 9  | 101 | 118 | 13 | 6766 | 539 | 535 | 93-28 | 98-24 |
| 835 | 32 | 45 | 13 | 94  | 115 | 7  | 6812 | 518 | 617 | 93-73 | 98-36 |
| 836 | 32 | 64 | 22 | 95  | 145 | 8  | 6767 | 585 | 540 | 90-99 | 97-96 |
| 825 | 43 | 60 | 11 | 81  | 140 | 14 | 6764 | 567 | 537 | 92-44 | 97-94 |
| 806 | 39 | 54 | 29 | 106 | 113 | 12 | 6763 | 594 | 551 | 91-06 | 98-33 |
| 844 | 32 | 48 | 11 | 90  | 136 | 9  | 6799 | 546 | 534 | 93-69 | 98-06 |
| 812 | 40 | 55 | 15 | 92  | 126 | 10 | 6729 | 524 | 617 | 92-41 | 98-16 |
| 770 | 37 | 52 | 18 | 96  | 131 | 8  | 6759 | 517 | 583 | 92-02 | 98-13 |
| 808 | 30 | 55 | 19 | 111 | 112 | 8  | 6792 | 568 | 530 | 91-89 | 98-40 |
| 953 | 46 | 57 | 19 | 88  | 134 | 10 | 6690 | 554 | 554 | 92-93 | 98-05 |
| 873 | 39 | 54 | 15 | 108 | 131 | 14 | 6770 | 547 | 513 | 92-97 | 98-06 |
| 847 | 43 | 51 | 22 | 81  | 105 | 8  | 6771 | 566 | 521 | 92-42 | 98-48 |
| 854 | 32 | 58 | 19 | 95  | 121 | 7  | 6737 | 507 | 592 | 92-00 | 98-26 |
| 818 | 36 | 54 | 9  | 103 | 130 | 10 | 6724 | 553 | 587 | 93-13 | 98-11 |
| 811 | 29 | 63 | 17 | 98  | 108 | 10 | 6788 | 605 | 474 | 91-30 | 98-43 |
| 852 | 40 | 57 | 16 | 105 | 117 | 14 | 6825 | 581 | 514 | 92-44 | 98-26 |
| 819 | 49 | 60 | 19 | 87  | 104 | 8  | 6761 | 595 | 530 | 91-66 | 98-50 |
| 832 | 43 | 54 | 17 | 107 | 127 | 7  | 6735 | 525 | 619 | 92-49 | 98-19 |
| 783 | 46 | 48 | 24 | 82  | 113 | 9  | 6874 | 513 | 583 | 92-01 | 98-38 |
| 845 | 32 | 53 | 24 | 112 | 121 | 12 | 6766 | 531 | 589 | 91-93 | 98-21 |
| 800 | 37 | 52 | 12 | 119 | 133 | 6  | 6786 | 553 | 561 | 92-90 | 98-14 |
| 860 | 35 | 50 | 17 | 84  | 136 | 8  | 6744 | 630 | 515 | 93-04 | 98-08 |
| 855 | 35 | 60 | 24 | 99  | 133 | 8  | 6735 | 570 | 502 | 91-38 | 98-11 |
| 832 | 38 | 50 | 24 | 103 | 127 | 10 | 6718 | 502 | 612 | 92-16 | 98-14 |
| 763 | 42 | 54 | 13 | 109 | 141 | 14 | 6748 | 549 | 545 | 92-32 | 97-92 |
| 803 | 41 | 54 | 22 | 105 | 124 | 11 | 6755 | 541 | 541 | 91-74 | 98-18 |
| 849 | 33 | 66 | 17 | 114 | 127 | 8  | 6719 | 500 | 606 | 91-40 | 98-16 |
| 789 | 43 | 55 | 21 | 102 | 123 | 12 | 6751 | 588 | 499 | 91-63 | 98-19 |
| 811 | 36 | 48 | 17 | 102 | 113 | 8  | 6752 | 527 | 622 | 92-87 | 98-36 |
| 837 | 36 | 59 | 14 | 96  | 126 | 10 | 6777 | 530 | 608 | 92-28 | 98-17 |
| 841 | 38 | 57 | 17 | 104 | 129 | 13 | 6769 | 534 | 534 | 92-24 | 98-09 |



## S5

Phylogeny defining SNPs removed by the algorithm: SNPs listed in either Coll *et. al.* (25176035[uid]) or Feuerriegel *et. al.* (24458512[uid]), that were in the 23 candidate-genes, and that occurred in any of the 3651 sequences, were identified and set aside by the algorithm. Additional lineage or sub-lineage associated SNPs not listed in the referenced papers were identified manually and also set aside (source left as blank in table, but lineage either given in the table or location of SNP indicated in figure where it defines a sub-lineage).

| <b><u>Lineage defining mutations</u></b> | <b><u>SNPs</u></b> | <b><u>Source</u></b>                     | <b><u>Lineage name (spoligotype-based names taken from Coll <i>et. al.</i>)</u></b> |
|------------------------------------------|--------------------|------------------------------------------|-------------------------------------------------------------------------------------|
| ahpC_G-88A                               | G/A                | Coll <i>et. al.</i> 25176035[uid]        | Central Asian                                                                       |
| embA_P913S                               | CCG/TCG            | Coll <i>et. al.</i> 25176035[uid]        | Indo-Oceanic                                                                        |
| embA_T608N                               | ACC/AAC            | Coll <i>et. al.</i> 25176035[uid]        | Euro-American (T2)                                                                  |
| embA_V206M                               | GTG/ATG            | Coll <i>et. al.</i> 25176035[uid]        | Indo-Oceanic (EAI4;EAI5;EAI6;EAI3)                                                  |
| embB_E378A                               | GAG/GCG            | Feuerriegel <i>et. al.</i> 24458512[uid] | Indo-Oceanic, Ethiopian, <i>M. africanum</i> 1 & 2, <i>M. bovis</i>                 |
| embB_Q139H                               | CAG/CAC            | Coll <i>et. al.</i> 25176035[uid]        | Euro-American (X-type)                                                              |
| embC_N394D                               | AAC/GAC            | Coll <i>et. al.</i> 25176035[uid]        | Indo-Oceanic                                                                        |
| embC_R567H                               | CGC/CAC            | Coll <i>et. al.</i> 25176035[uid]        | Central Asian (CAS1-Kili)                                                           |
| embC_R738Q                               | CGG/CAG            | Coll <i>et. al.</i> 25176035[uid]        | Central Asian                                                                       |
| embC_T270I                               | ACC/ATC            | Feuerriegel <i>et. al.</i> 24458512[uid] | <i>M. africanum</i> and animal lineages                                             |
| embC_V104M                               | GTG/ATG            |                                          | Central Asian sub-lineage                                                           |
| embC_V981L                               | GTG/CTG            | Coll <i>et. al.</i> 25176035[uid]        | Euro-American (T;H;X)                                                               |
| embR_C110Y                               | TGC/TAC            | Coll <i>et. al.</i> 25176035[uid]        | Indo-Oceanic                                                                        |
| embR_H124R                               | CAC/CGC            | Coll <i>et. al.</i> 25176035[uid]        | Ethiopian                                                                           |
| embR_L313R                               | CTG/CGG            | Coll <i>et. al.</i> 25176035[uid]        | Euro-American (T2)                                                                  |
| embR_Y216H                               | TAC/CAC            | Coll <i>et. al.</i> 25176035[uid]        | Euro-American (T3)                                                                  |
| gidB_A119T                               | GCC/ACC            |                                          | Indo-Oceanic sub-lineage                                                            |
| gidB_E92D                                | GAA/GAC            | Coll <i>et. al.</i> 25176035[uid]        | East Asian (Beijing)                                                                |
| gidB_L16R                                | CTT/CGT            | Coll <i>et. al.</i> 25176035[uid]        | Euro-American (LAM)                                                                 |
| gidB_S100F                               | TCT/TTT            |                                          | All other than H37Rv<br>Indo-Oceanic                                                |
| gyrA_A384V                               | GCA/GTA            | Coll <i>et. al.</i> 25176035[uid]        | All other than H37Rv                                                                |
| gyrA_E21Q                                | GAG/CAG            |                                          | All other than H37Rv                                                                |
| gyrA_G247S                               | GGC/AGC            | Coll <i>et. al.</i> 25176035[uid]        | Euro-American (LAM9;T5)                                                             |
| gyrA_G668D                               | GGC/GAC            |                                          | All other than Euro-American sub-lineage                                            |
| gyrA_S95T                                | AGC/ACC            | Feuerriegel <i>et. al.</i> 24458512[uid] | H37Rv                                                                               |
| gyrA_T80A                                | ACC/GCG            | Coll <i>et. al.</i> 25176035[uid]        | Euro-American (T2-Uganda;T2)                                                        |
| gyrB_A442S                               | GCG/TCG            |                                          | <i>M. bovis</i> and <i>M. africanum</i> 1 & 2                                       |
| gyrB_C-48T                               | C/T                |                                          | Indo-Oceanic sub-lineage                                                            |
| gyrB_M330I                               | ATG/ATC            |                                          | Indo-Oceanic                                                                        |
| inhA_V78A                                | GTG/GCG            | Coll <i>et. al.</i> 25176035[uid]        | <i>M. africanum</i> 2                                                               |
| iniA_H481Q                               | CAT/CAG            |                                          | Indo-Oceanic, Ethiopian, <i>M. africanum</i> 1 & 2, <i>M. bovis</i>                 |
| katG_R463L                               | CGG/CTG            | Coll <i>et. al.</i> 25176035[uid]        | Euro-American                                                                       |
| manB_D152N                               | GAC/ACC            |                                          | Central Asian                                                                       |
| ndh_G-70T                                | G/T                |                                          | <i>M. africanum</i> 1                                                               |
| ndh_R284W                                | CGG/TGG            |                                          | <i>M. bovis</i> sub-lineage                                                         |
| ndh_V18A                                 | GTG/GCG            | Coll <i>et. al.</i> 25176035[uid]        | Euro-American (S; T1)                                                               |
| pncA_H57D                                | CAC/GAC            | Feuerriegel <i>et. al.</i> 24458512[uid] | <i>M. bovis</i>                                                                     |
| rmlD_S257P                               | TCG/CCG            |                                          | Indo-Oceanic, Ethiopian, <i>M. africanum</i> 1 & 2, <i>M. bovis</i>                 |
| rpoB_C-61T                               | C/T                |                                          | Central Asian sub-lineage                                                           |
| rpsA_A440T                               | GCG/ACG            | Feuerriegel <i>et. al.</i> 24458512[uid] | <i>M. caprae</i> (but also <i>M. bovis</i> )                                        |
| rpsA_T459P                               | ACC/CCC            | Coll <i>et. al.</i> 25176035[uid]        | Ethiopian                                                                           |
| rrs_C492T                                | C/T                | Coll <i>et. al.</i> 25176035[uid]        | Euro-American (LAM3)                                                                |

Location of sub-lineage defining SNPs not referenced in the literature.

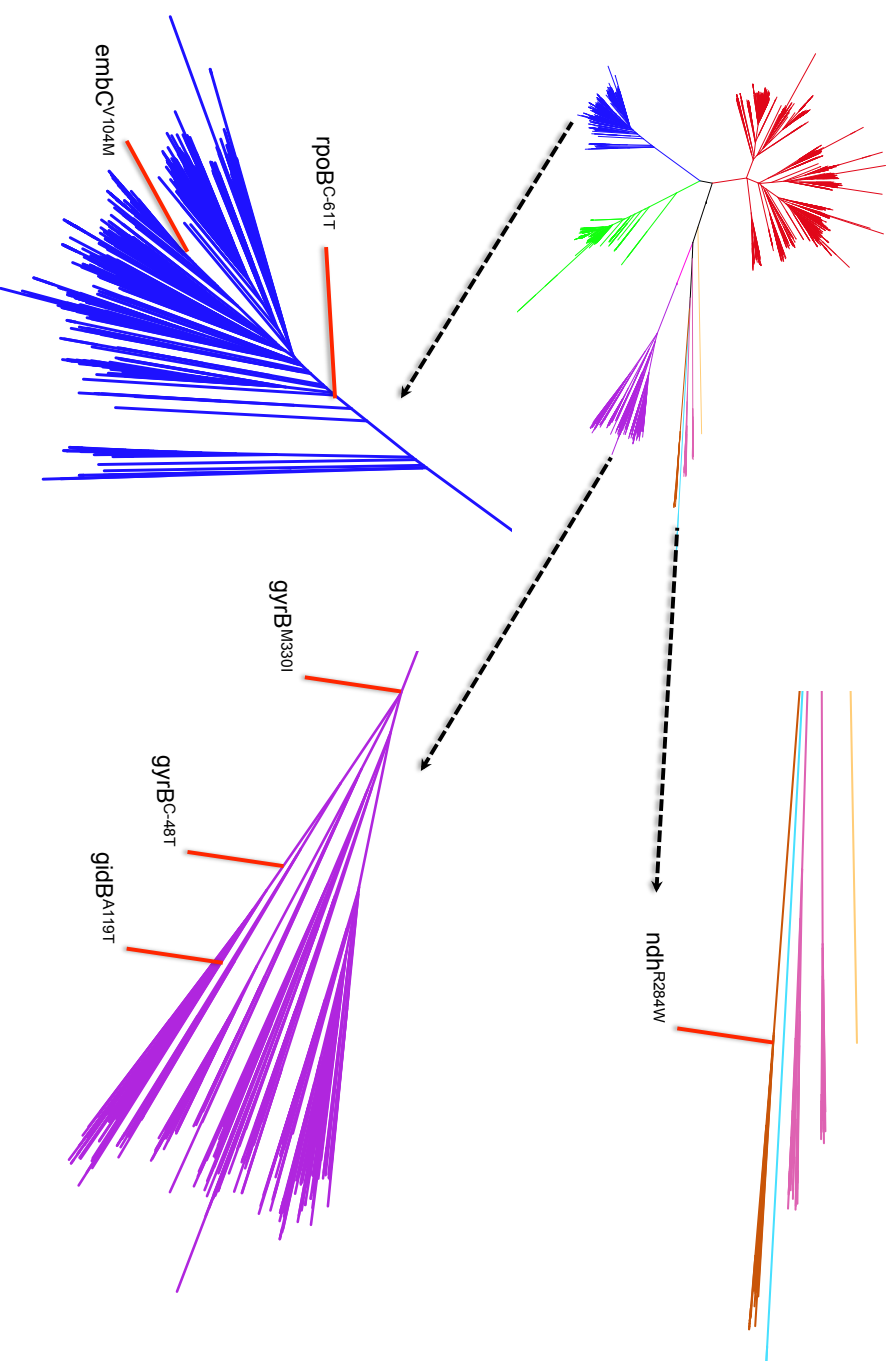

## S6

Each step in the algorithm is depicted here as a schematic. First, all sequences were mapped to the H37Rv *M. tuberculosis* reference genome. Across the genes of interest and their promoter regions (defined as 100 base-pairs upstream), all base-calls were identified as either the same as reference, different from reference, or 'null' (N) where no base could be called because of insufficient coverage or because there was evidence for more than one base ('mixed-call'). Five hypothetical sequences are shown here (Seq 1-5).

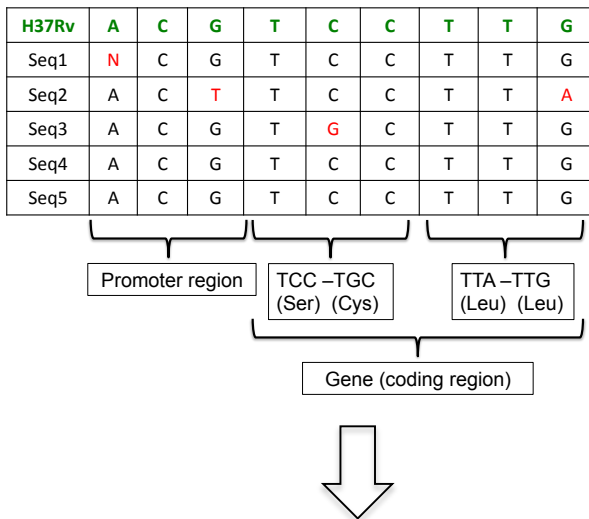

Where one or more sequences differed from the reference just on the basis of a null-call, and all others are identical to the reference, that nucleotide position (be it upstream or within a gene) was set aside and not considered of further interest. Positions at which at least one sequence had a SNP in a promoter region, or a SNP leading to non-synonymous amino-acid substitution, were identified for further analysis. Where codons differed from the reference only on the basis of one or more sequences that had a synonymous SNP within the codon, they were also set aside.

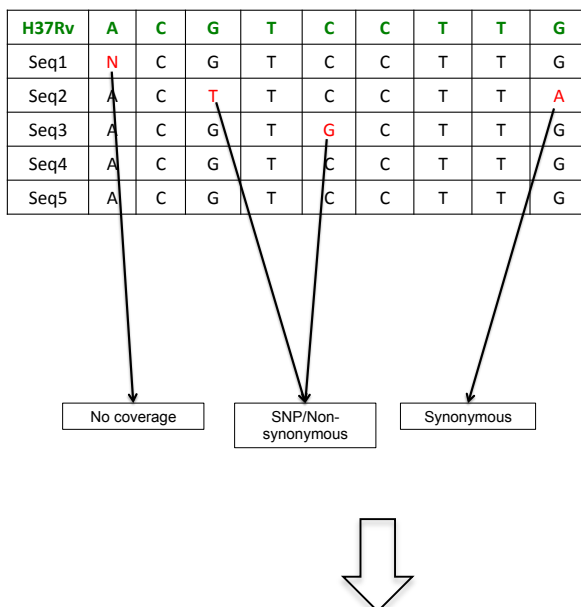

Among the remaining mutations (SNPs, AA substitutions and indels), some were identified as lineage, or phylogeny defining and therefore set aside. Others were only seen in sequences / isolates that had not been phenotyped to the relevant drug. These were also set aside. The remaining mutations were then characterised as either resistance-determining or as benign.

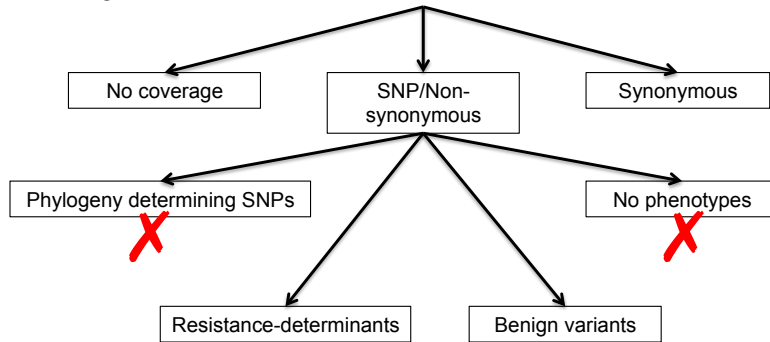

Resistance-determinants were identified by focussing on all genes relevant to a drug. In the example below, the five genes believed to be relevant to isoniazid are shown for a single sample / sequence. Each position within each gene is marked by a coloured line where the reference mutation has not been called. After the null-calls are set aside from otherwise invariant positions, the synonymous mutations are set aside, and the phylogeny/lineage defining mutations ('PhyloSNPs') are set aside, only a single mutation remains (circled). If this sample in question is phenotypically resistant to isoniazid, then this remaining mutation is defined as a resistance-determinant and all other sample containing this mutation (genotypically) predicted to be resistant on this basis.

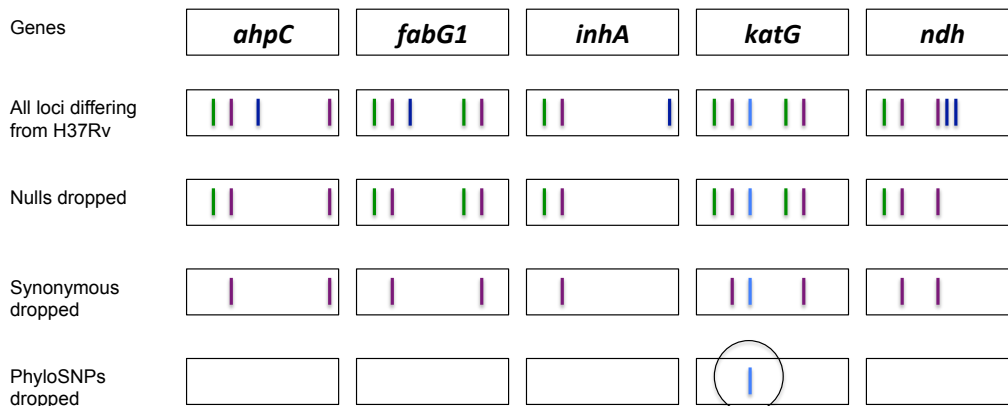

Conclusion: SNP is classified as "resistance-determinant" for isoniazid in sample 1

Prediction: SNP is a "resistance-determinant" for isoniazid in all other samples in which it's seen

Were the phenotype to have been susceptible in this example, all other isolates containing the circled mutation would have had to have been inspected before the mutation could be characterised. Two scenarios could lead to the mutation being characterised as benign. First, if all isolates containing the mutation were phenotypically susceptible. Second, if all isolates containing only that mutation were phenotypically susceptible (see below).

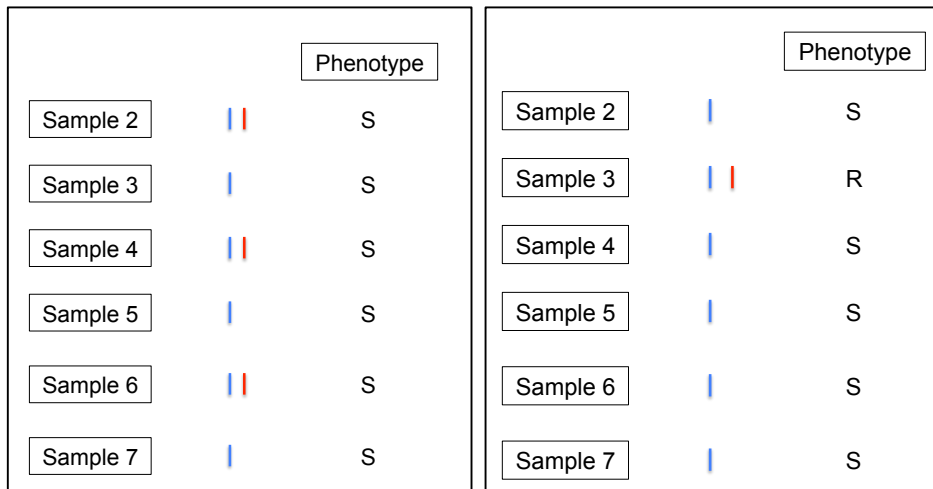

As can be seen in the right hand panel, the benign 'blue mutation' occurs in one phenotypically resistant isolate. Benign mutations were therefore set aside before a second iteration of the algorithm was undertaken in an attempt to reveal additional lone-standing resistance-determinants. The process is illustrated below where the circled mutation characterised as 'benign' on the basis of other samples (as in the right hand panel above) is set aside to reveal a lone-standing mutation that could now be characterised as resistance-determining, in this resistant sample.

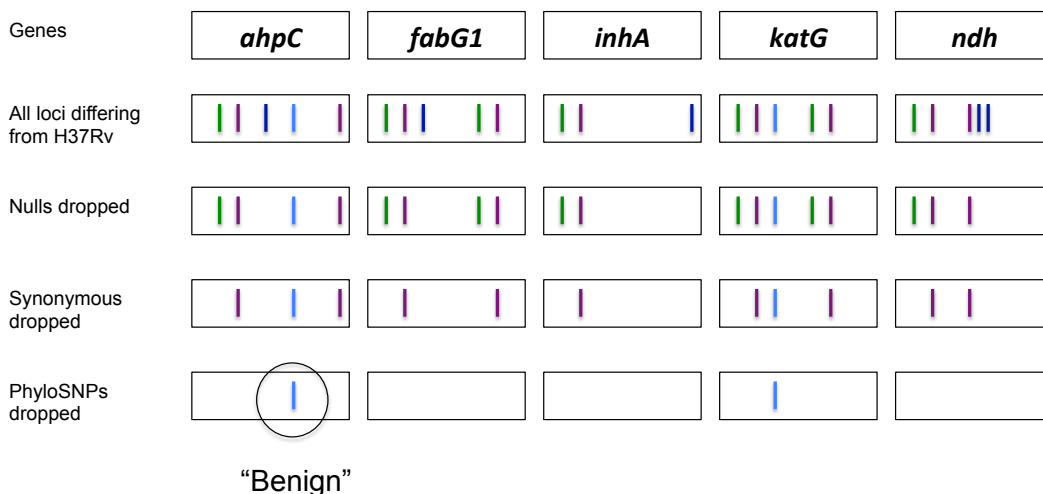

When new sequences are added to a training-set, this has the potential to lead to the re-characterisation of mutations. For example, adding an eighth sample containing the 'blue mutation' to the left hand panel above would lead to the re-characterisation of that mutation as 'resistant' if the phenotype for that eighth sample were resistant. Resistant mutations could however only be re-characterised as benign where their original characterisation as 'resistant' was dependent on another mutation being characterised as benign (as immediately above) *and* where the mutation is otherwise always associated with a susceptible phenotype when occurring as the only mutation in a sample (as in the right hand panel above).

### S6.1

The full results of the algorithm as applied to the original training set are shown below.

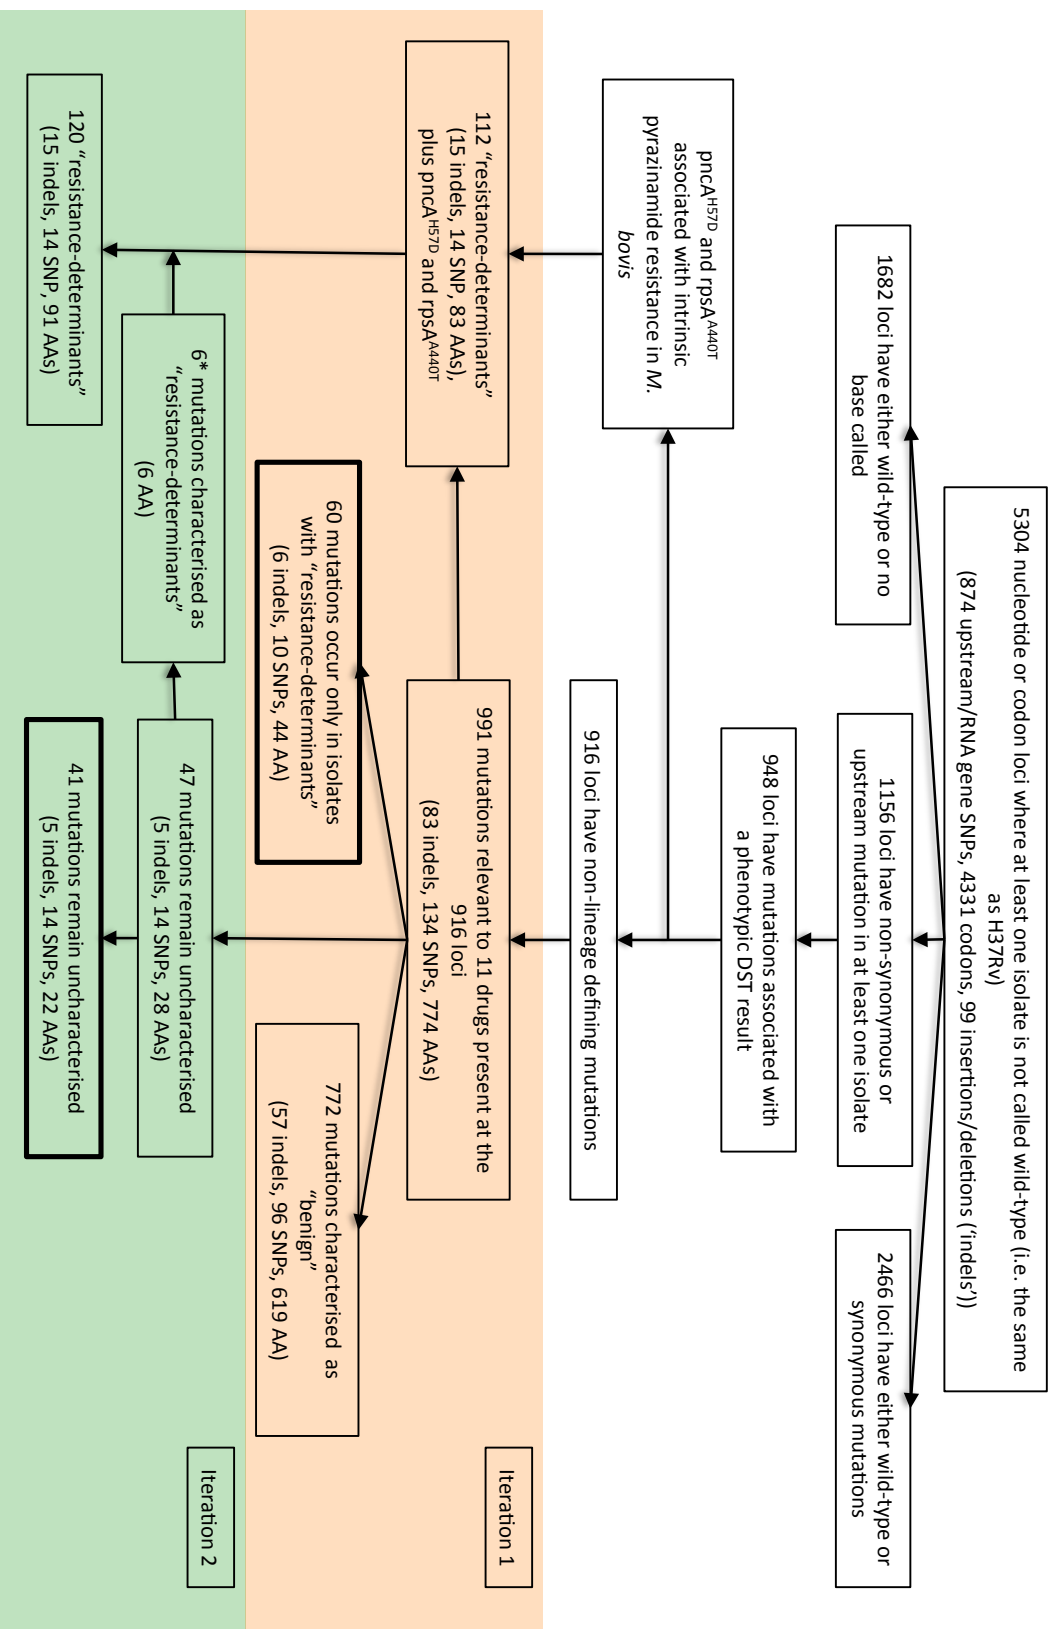

## S7

Uncharacterised mutations that only occur in resistant phenotypes.

| <b><u>Mutations</u></b> | <b><u>Drug</u></b> |
|-------------------------|--------------------|
| ahpC_54_insGT           | INH                |
| ahpC_C-54T              | INH                |
| ahpC_D73H               | INH                |
| ahpC_E76K               | INH                |
| ahpC_F108S              | INH                |
| ahpC_G-48A              | INH                |
| ahpC_G-74A              | INH                |
| ahpC_G32D               | INH                |
| ahpC_T-42C              | INH                |
| ahpC_W96C               | INH                |
| fabG1_T-8A              | INH                |
| fabG1_T-8G              | INH                |
| inhA_I21V               | INH                |
| inhA_T162S              | INH                |
| katG_24_insCA           | INH                |
| katG_A-75G              | INH                |
| katG_A109T              | INH                |
| katG_A244G              | INH                |
| katG_C549S              | INH                |
| katG_D542E              | INH                |
| katG_G34A               | INH                |
| katG_L427F              | INH                |
| katG_Q471R              | INH                |
| katG_R78G               | INH                |
| katG_S211N              | INH                |
| katG_T579A              | INH                |
| katG_W149R              | INH                |
| katG_Y155S              | INH                |
| ndh_D143A               | INH                |
| ndh_K208E               | INH                |
| ndh_K32E                | INH                |
| rpoB_389_insATGTCGT     | RIF                |
| rpoB_A538V              | RIF                |
| rpoB_I480V              | RIF                |
| rpoB_P45S               | RIF                |
| rpoB_Q975H              | RIF                |
| rpoB_R219C              | RIF                |
| rpoB_S874F              | RIF                |
| rpoB_V168A              | RIF                |
| rpoB_V496A              | RIF                |
| embA_68_delC            | EMB                |
| embA_A813G              | EMB                |
| embA_C-11A              | EMB                |

|               |     |
|---------------|-----|
| embA_C-8T     | EMB |
| embA_G759R    | EMB |
| embB_G156C    | EMB |
| embB_M423T    | EMB |
| embB_W1089R   | EMB |
| embC_A387V    | EMB |
| embR_458_delG | EMB |
| iniA_N50D     | EMB |
| iniA_V544A    | EMB |
| iniC_G194R    | EMB |
| iniC_G341V    | EMB |
| gidB_504_delC | SM  |
| tlyA_C-83T    | SM  |
| gyrA_D641E    | CIP |
| gidB_L108P    | AK  |
| gidB_L108P    | CAP |
| gidB_L108P    | KAN |

## S8

The 120 resistance-determinants derived from the original training-set are shown. Each mutation can be counted more than once if it is characterised as a resistance-determinant to more than one drug. The number of resistant and susceptible phenotypes with which each resistance-determinant is associated is shown, and a Pubmed identifier is given if the mutation has been described as resistance-determining before. 79/120 (66%) resistance-determinant/drug combinations had previously been described in the literature. This compared to 31/772 (4%) 'benign' mutations and 20/71 (28%) mutations defining lineages not intrinsically drug-resistant (counting each mutation once for each drug it was characterised for, i.e. some counting some more than once).

| Mutations   | Drug | Resistant | Susceptible | Total | Pubmed link to reference previously citing the mutation |
|-------------|------|-----------|-------------|-------|---------------------------------------------------------|
| ahpC_C-57T  | INH  | 1         | 0           | 1     |                                                         |
| eis_G-10A   | KAN  | 4         | 0           | 4     | 21300839[uid]                                           |
| embB_D354A  | EMB  | 1         | 1           | 2     | 20427375[uid]                                           |
| embB_G406A  | EMB  | 1         | 3           | 4     | 10639358[uid]                                           |
| embB_G406D  | EMB  | 2         | 2           | 4     | 10639358[uid]                                           |
| embB_G406S  | EMB  | 3         | 5           | 8     | 10639358[uid]                                           |
| embB_H1002R | EMB  | 1         | 0           | 1     | 22646308[uid] **                                        |
| embB_M306I  | EMB  | 20        | 34          | 54    | 9257740[uid]                                            |
| embB_M306V  | EMB  | 18        | 3           | 21    | 9257740[uid]                                            |
| embB_Q497K  | EMB  | 1         | 2           | 3     | 10639358[uid]                                           |
| embB_Q497R  | EMB  | 8         | 4           | 12    | 10639358[uid]                                           |
| fabG1_C-15T | INH  | 73        | 6           | 79    | 10428945[uid]                                           |
| fabG1_G-17T | INH  | 5         | 1           | 6     | 14638486[uid]                                           |
| fabG1_T-8C  | INH  | 3         | 3           | 6     | 15793126[uid]                                           |



|                |     |     |   |     |                  |
|----------------|-----|-----|---|-----|------------------|
| gidB_141_delC  | SM  | 1   | 0 | 1   |                  |
| gidB_202_delG  | SM  | 4   | 7 | 11  |                  |
| gidB_202_insGC | SM  | 1   | 1 | 2   |                  |
| gidB_A134E     | SM  | 1   | 0 | 1   | 17238915[uid]    |
| gidB_A138T     | SM  | 1   | 0 | 1   |                  |
| gidB_A138V     | SM  | 2   | 1 | 3   |                  |
| gidB_A200E     | SM  | 2   | 0 | 2   | 17238915[uid]    |
| gidB_A80P      | SM  | 1   | 0 | 1   | 24102832[uid]    |
| gidB_G69D      | SM  | 3   | 0 | 3   |                  |
| gidB_H48N      | SM  | 2   | 0 | 2   |                  |
| gidB_L91P      | SM  | 1   | 0 | 1   |                  |
| gidB_P75L      | SM  | 1   | 1 | 2   |                  |
| gidB_R137W     | SM  | 1   | 1 | 2   | 21444711[uid]    |
| gidB_S70N      | SM  | 1   | 0 | 1   |                  |
| gidB_V65G      | SM  | 1   | 0 | 1   |                  |
| gidB_V88A      | SM  | 2   | 0 | 2   |                  |
| gyrA_A74S      | CIP | 2   | 0 | 2   | 17035499[uid]    |
| gyrA_A90V      | MOX | 2   | 0 | 2   | 8031045[uid]     |
| gyrA_A90V      | OFX | 2   | 0 | 2   | 8031045[uid]     |
| gyrA_D94A      | MOX | 1   | 0 | 1   | 8031045[uid]     |
| gyrA_D94A      | OFX | 1   | 0 | 1   | 8031045[uid]     |
| gyrA_D94G      | CIP | 18  | 1 | 19  | 8031045[uid]     |
| gyrA_D94G      | MOX | 9   | 4 | 13  | 8031045[uid]     |
| gyrA_D94G      | OFX | 9   | 3 | 12  | 8031045[uid]     |
| gyrA_D94N      | MOX | 1   | 0 | 1   | 8031045[uid]     |
| gyrA_D94N      | OFX | 1   | 0 | 1   | 8031045[uid]     |
| gyrA_S91P      | CIP | 2   | 2 | 4   | 8031045[uid]     |
| gyrA_S91P      | MOX | 3   | 0 | 3   | 8031045[uid]     |
| gyrA_S91P      | OFX | 3   | 0 | 3   | 8031045[uid]     |
| inhA_I194T     | INH | 2   | 0 | 2   | 16495272[uid]    |
| inhA_I21T      | INH | 2   | 0 | 2   | 14638486[uid]    |
| inhA_S94A      | INH | 4   | 1 | 5   | 10815738[uid]    |
| katG_1450_delC | INH | 1   | 0 | 1   |                  |
| katG_1910_delA | INH | 1   | 0 | 1   |                  |
| katG_471_delG  | INH | 2   | 0 | 2   |                  |
| katG_L159P     | INH | 1   | 0 | 1   |                  |
| katG_S315N     | INH | 2   | 1 | 3   | 9210694[uid]     |
| katG_S315T     | INH | 195 | 1 | 196 | 8537659[uid]     |
| katG_T180K     | INH | 1   | 0 | 1   | 16870753[uid]    |
| katG_V633A     | INH | 1   | 1 | 2   |                  |
| katG_W191R     | INH | 1   | 0 | 1   | 15793126[uid]    |
| katG_W300C     | INH | 1   | 0 | 1   | 22646308[uid] ** |
| katG_W328L     | INH | 1   | 0 | 1   | 9210694[uid]     |
| katG_W90R      | INH | 1   | 0 | 1   |                  |
| pncA_177_delC  | PZA | 1   | 0 | 1   |                  |
| pncA_292_insAT | PZA | 1   | 0 | 1   |                  |

|                         |     |    |    |    |               |
|-------------------------|-----|----|----|----|---------------|
| pncA_409_delT           | PZA | 2  | 0  | 2  |               |
| pncA_491_insACC         | PZA | 1  | 0  | 1  |               |
| pncA_494_delC           | PZA | 1  | 0  | 1  |               |
| pncA_528_insGGCCGTCTGGC | PZA | 1  | 0  | 1  |               |
| pncA_570_insCT          | PZA | 2  | 0  | 2  |               |
| pncA_A-11G              | PZA | 3  | 0  | 3  | 9056006[uid]  |
| pncA_C138R              | PZA | 1  | 0  | 1  | 25336456[uid] |
| pncA_C14R               | PZA | 1  | 0  | 1  | 9055989[uid]  |
| pncA_D12A               | PZA | 1  | 0  | 1  | 9055989[uid]  |
| pncA_D136N              | PZA | 1  | 2  | 3  | 11641519[uid] |
| pncA_D49N               | PZA | 1  | 0  | 1  |               |
| pncA_D8G                | PZA | 1  | 0  | 1  | 11641519[uid] |
| pncA_D8N                | PZA | 1  | 0  | 1  | 25336456[uid] |
| pncA_G132D              | PZA | 1  | 0  | 1  | 9692180[uid]  |
| pncA_G162D              | PZA | 1  | 0  | 1  | 17360809[uid] |
| pncA_G78C               | PZA | 1  | 0  | 1  |               |
| pncA_G97D               | PZA | 1  | 0  | 1  | 11083630[uid] |
| pncA_H57D               | PZA | 11 | 0  | 11 | 9056006[uid]  |
| pncA_H57R               | PZA | 2  | 0  | 2  |               |
| pncA_K96T               | PZA | 1  | 0  | 1  | 9055989[uid]  |
| pncA_L172P              | PZA | 1  | 0  | 1  | 9692180[uid]  |
| pncA_L27P               | PZA | 1  | 0  | 1  | 17596354[uid] |
| pncA_L4S                | PZA | 4  | 0  | 4  | 11083630[uid] |
| pncA_Q10*               | PZA | 1  | 0  | 1  | 10390239[uid] |
| pncA_Q141*              | PZA | 1  | 0  | 1  | 11641519[uid] |
| pncA_S104R              | PZA | 2  | 0  | 2  | 9692180[uid]  |
| pncA_T-12C              | PZA | 3  | 0  | 3  |               |
| pncA_V125G              | PZA | 4  | 0  | 4  | 18573039[uid] |
| pncA_V139L              | PZA | 1  | 0  | 1  | 11083630[uid] |
| pncA_V180F              | PZA | 1  | 0  | 1  | 11641519[uid] |
| pncA_V7L                | PZA | 3  | 0  | 3  |               |
| pncA_W68C               | PZA | 1  | 0  | 1  | 25336456[uid] |
| rpoB_1396_insATTC       | RIF | 2  | 0  | 2  |               |
| rpoB_1427_delTGGCCCC    | RIF | 1  | 0  | 1  |               |
| rpoB_D435F              | RIF | 1  | 0  | 1  | 16229229[uid] |
| rpoB_D435V              | RIF | 4  | 0  | 4  | 15184414[uid] |
| rpoB_H445D              | RIF | 6  | 0  | 6  | 14729930[uid] |
| rpoB_H445N              | RIF | 1  | 4  | 5  | 14729930[uid] |
| rpoB_H445R              | RIF | 3  | 0  | 3  | 9003625[uid]  |
| rpoB_H445Y              | RIF | 12 | 0  | 12 | 8027320[uid]  |
| rpoB_I491F              | RIF | 4  | 19 | 23 | 10565894[uid] |
| rpoB_L452P              | RIF | 4  | 4  | 8  | 10921994[uid] |
| rpoB_Q432K              | RIF | 1  | 0  | 1  | 8027320[uid]  |
| rpoB_S431G              | RIF | 1  | 0  | 1  | 17360809[uid] |
| rpoB_S450F              | RIF | 4  | 0  | 4  | 15728936[uid] |
| rpoB_S450L              | RIF | 59 | 1  | 60 | 7946393[uid]  |

|            |     |    |   |    |               |
|------------|-----|----|---|----|---------------|
| rpoB_S450W | RIF | 3  | 1 | 4  | 7759399[uid]  |
| rpoB_V170F | RIF | 2  | 1 | 3  |               |
| rpoB_V262A | RIF | 1  | 0 | 1  |               |
| rpoB_V359A | RIF | 1  | 0 | 1  |               |
| rpsA_A440T | PZA | 11 | 0 | 11 |               |
| rpsL_K43R  | SM  | 24 | 0 | 24 | 7968530[uid]  |
| rpsL_K88R  | SM  | 11 | 0 | 11 | 7934937[uid]  |
| rrs_A1401G | AK  | 5  | 0 | 5  | 8971706[uid]  |
| rrs_A1401G | CAP | 5  | 0 | 5  |               |
| rrs_A1401G | KAN | 5  | 0 | 5  |               |
| rrs_A514C  | SM  | 2  | 0 | 2  | 22943573[uid] |
| rrs_C513T  | SM  | 2  | 0 | 2  |               |
| rrs_C517T  | SM  | 2  | 0 | 2  | 15567277[uid] |
| tlyA_C-83T | CAP | 1  | 0 | 1  |               |

\*\* publication based on subset of sequences included in this study.

## S8.1

Characterisation of mutations previously identified in the literature as resistance-determinants. The 'literature' was defined as any mutation listed in the Dream TB database project (<https://tbdreamdb.ki.se/Info/>),<sup>4</sup> any mutation contained on one of the three line-probe assays (which also cover those identified by the Cepheid MTB/RIF Xpert). An additional manual search was also performed for any of the 120 resistance-determinants that did not match any of these sources. Analysing the literature like this of course introduces bias, as we look harder for evidence of the resistance-determining mutations in the literature than we do for the other mutations. However, that lineage-defining mutations have been characterised as resistance-determinants in the published literature at all is evidence of noise, only more of which would be found by a further manual trawl for mutations. Each mutation is counted for each drug it is associated with (i.e. some mutations are counted more than once).

| Mutation   | Drug | Characterisation       |
|------------|------|------------------------|
| pncA_S104R | PZA  | Resistance-determinant |
| gidB_R137W | SM   | Resistance-determinant |
| katG_W328L | INH  | Resistance-determinant |
| pncA_K96T  | PZA  | Resistance-determinant |
| rpoB_H445R | RIF  | Resistance-determinant |
| rpsL_K43R  | SM   | Resistance-determinant |
| rpoB_S450F | RIF  | Resistance-determinant |
| rpoB_D435V | RIF  | Resistance-determinant |
| gyrA_D94A  | OFX  | Resistance-determinant |
| fabG1_T-8C | INH  | Resistance-determinant |
| embB_M306I | EMB  | Resistance-determinant |
| gidB_A200E | SM   | Resistance-determinant |
| pncA_C138R | PZA  | Resistance-determinant |
| rpoB_Q432K | RIF  | Resistance-determinant |

|             |     |                        |
|-------------|-----|------------------------|
| pncA_V180F  | PZA | Resistance-determinant |
| embB_G406D  | EMB | Resistance-determinant |
| rpoB_D435F  | RIF | Resistance-determinant |
| pncA_W68C   | PZA | Resistance-determinant |
| embB_D354A  | EMB | Resistance-determinant |
| gyrA_S91P   | MOX | Resistance-determinant |
| inhA_S94A   | INH | Resistance-determinant |
| embB_Q497R  | EMB | Resistance-determinant |
| pncA_V139L  | PZA | Resistance-determinant |
| gyrA_D94G   | CIP | Resistance-determinant |
| fabG1_C-15T | INH | Resistance-determinant |
| pncA_L4S    | PZA | Resistance-determinant |
| rpoB_H445D  | RIF | Resistance-determinant |
| katG_S315N  | INH | Resistance-determinant |
| rpoB_S450W  | RIF | Resistance-determinant |
| pncA_G162D  | PZA | Resistance-determinant |
| pncA_D8N    | PZA | Resistance-determinant |
| gyrA_D94N   | MOX | Resistance-determinant |
| pncA_C14R   | PZA | Resistance-determinant |
| rrs_A1401G  | KAN | Resistance-determinant |
| pncA_A-11G  | PZA | Resistance-determinant |
| rpoB_S431G  | RIF | Resistance-determinant |
| rpsL_K88R   | SM  | Resistance-determinant |
| pncA_Q141*  | PZA | Resistance-determinant |
| pncA_L172P  | PZA | Resistance-determinant |
| gyrA_S91P   | OFX | Resistance-determinant |
| pncA_G97D   | PZA | Resistance-determinant |
| rpoB_L452P  | RIF | Resistance-determinant |
| pncA_G132D  | PZA | Resistance-determinant |
| fabG1_G-17T | INH | Resistance-determinant |
| rrs_A514C   | SM  | Resistance-determinant |
| rrs_C517T   | SM  | Resistance-determinant |
| katG_T180K  | INH | Resistance-determinant |
| rrs_A1401G  | CAP | Resistance-determinant |
| gidB_A134E  | SM  | Resistance-determinant |
| gyrA_D94N   | OFX | Resistance-determinant |
| katG_S315T  | INH | Resistance-determinant |
| pncA_H57D   | PZA | Resistance-determinant |
| rpoB_I491F  | RIF | Resistance-determinant |
| embB_M306V  | EMB | Resistance-determinant |
| gyrA_D94A   | MOX | Resistance-determinant |
| gidB_A80P   | SM  | Resistance-determinant |
| rrs_A1401G  | AK  | Resistance-determinant |
| rpoB_H445N  | RIF | Resistance-determinant |
| pncA_D12A   | PZA | Resistance-determinant |
| embB_G406S  | EMB | Resistance-determinant |

|            |     |                        |
|------------|-----|------------------------|
| inhA_I194T | INH | Resistance-determinant |
| embB_G406A | EMB | Resistance-determinant |
| gyrA_A74S  | CIP | Resistance-determinant |
| rpoB_S450L | RIF | Resistance-determinant |
| pncA_D8G   | PZA | Resistance-determinant |
| gyrA_A90V  | MOX | Resistance-determinant |
| rpoB_H445Y | RIF | Resistance-determinant |
| inhA_I21T  | INH | Resistance-determinant |
| gyrA_S91P  | CIP | Resistance-determinant |
| pncA_D136N | PZA | Resistance-determinant |
| pncA_L27P  | PZA | Resistance-determinant |
| pncA_V125G | PZA | Resistance-determinant |
| eis_G-10A  | KAN | Resistance-determinant |
| gyrA_D94G  | OFX | Resistance-determinant |
| katG_W191R | INH | Resistance-determinant |
| pncA_Q10*  | PZA | Resistance-determinant |
| gyrA_D94G  | MOX | Resistance-determinant |
| embB_Q497K | EMB | Resistance-determinant |
| gyrA_A90V  | OFX | Resistance-determinant |
|            |     |                        |
| embR_C110Y | EMB | Lineage-defining       |
| katG_R463L | INH | Lineage-defining       |
| rmlD_S257P | EMB | Lineage-defining       |
| embC_V981L | EMB | Lineage-defining       |
| manB_D152N | EMB | Lineage-defining       |
| gidB_L16R  | SM  | Lineage-defining       |
| gyrA_S95T  | OFX | Lineage-defining       |
| embC_N394D | EMB | Lineage-defining       |
| embC_R738Q | EMB | Lineage-defining       |
| ndh_V18A   | INH | Lineage-defining       |
| embA_P913S | EMB | Lineage-defining       |
| inhA_V78A  | INH | Lineage-defining       |
| gyrA_S95T  | CIP | Lineage-defining       |
| gyrA_T80A  | MOX | Lineage-defining       |
| gyrA_S95T  | MOX | Lineage-defining       |
| gyrA_T80A  | OFX | Lineage-defining       |
| gidB_E92D  | SM  | Lineage-defining       |
| embB_E378A | EMB | Lineage-defining       |
| embC_T270I | EMB | Lineage-defining       |
| gyrA_T80A  | CIP | Lineage-defining       |
|            |     |                        |
| iniC_P248A | EMB | Benign                 |
| ahpC_C-52T | INH | Benign                 |
| gyrA_D94H  | MOX | Benign                 |
| rpoB_L430P | RIF | Benign                 |
| pncA_Y64D  | PZA | Benign                 |

|            |     |                 |
|------------|-----|-----------------|
| pncA_V21G  | PZA | Benign          |
| iniA_S501W | EMB | Benign          |
| pncA_L35R  | PZA | Benign          |
| ndh_R268H  | INH | Benign          |
| gyrA_D94H  | CIP | Benign          |
| pncA_A146T | PZA | Benign          |
| embA_A201T | EMB | Benign          |
| pncA_T47A  | PZA | Benign          |
| embB_M306L | EMB | Benign          |
| gyrA_A90G  | CIP | Benign          |
| rpoB_D435Y | RIF | Benign          |
| gyrA_A90G  | OFX | Benign          |
| embC_A307T | EMB | Benign          |
| embB_F285L | EMB | Benign          |
| pncA_V139A | PZA | Benign          |
| rmlD_G-71T | EMB | Benign          |
| katG_T394A | INH | Benign          |
| embA_C-16T | EMB | Benign          |
| gyrA_A90G  | MOX | Benign          |
| embB_L370R | EMB | Benign          |
| embB_P430L | EMB | Benign          |
| pncA_H71Y  | PZA | Benign          |
| pncA_T87M  | PZA | Benign          |
| gyrA_D94H  | OFX | Benign          |
| katG_M257I | INH | Benign          |
| gidB_S70R  | SM  | Benign          |
| embB_M306T | EMB | Uncharacterised |
| fabG1_T-8A | INH | Uncharacterised |
| rpsL_K88T  | SM  | Uncharacterised |
| gyrA_A90V  | CIP | Uncharacterised |
| embA_C-12T | EMB | Uncharacterised |
| rpoB_I480V | RIF | Uncharacterised |
| ahpC_E76K  | INH | Uncharacterised |
| fabG1_T-8G | INH | Uncharacterised |
| embA_C-11A | EMB | Uncharacterised |
| ahpC_G-74A | INH | Uncharacterised |
| inhA_I21V  | INH | Uncharacterised |
| katG_D695A | INH | Uncharacterised |
| ahpC_G-48A | INH | Uncharacterised |
| ahpC_C-54T | INH | Uncharacterised |
| katG_Y155S | INH | Uncharacterised |
| ahpC_D73H  | INH | Uncharacterised |

## S9

Genotypic predictions for all drugs for the training-set itself, and for the validation-set. Genotypic predictions based on: R (resistance-determinant); Rx (resistance-determinant as a mixed base-call); S0 (zero mutations present); Ss (only benign mutations present); U (uncharacterised mutations present). Weighted mean sensitivity and specificity presented as both an overall figure and as that based on characterised mutations only (R, Rx, S0, Ss columns). See below.

| Training-set                   | Phenotypically Resistant |                |                |                |            | Phenotypically Sensitive |                |                |                |             | All         |             | Excluding Unclassified |             |                |             |             |
|--------------------------------|--------------------------|----------------|----------------|----------------|------------|--------------------------|----------------|----------------|----------------|-------------|-------------|-------------|------------------------|-------------|----------------|-------------|-------------|
|                                | R                        | Genotype       |                |                | Total      | R                        | Genotype       |                |                | Total       | Sensitivity | Specificity | Sensitivity            | Specificity | % Unclassified |             |             |
|                                |                          | S <sub>1</sub> | S <sub>2</sub> | S <sub>3</sub> |            |                          | S <sub>1</sub> | S <sub>2</sub> | S <sub>3</sub> |             |             |             |                        |             |                |             |             |
| Isoniazid                      | 290                      | 5              | 18             | 0              | 2          | 315                      | 12             | 2              | 1601           | 156         | 1           | 1772        | 93.7                   | 99.2        | 94.2           | 99.2        | 0.1         |
| Rifampicin                     | 108                      | 1              | 1              | 0              | 0          | 110                      | 27             | 3              | 1833           | 62          | 16          | 1941        | 99.1                   | 98.5        | 99.1           | 98.4        | 0.8         |
| Ethambutol                     | 51                       | 3              | 1              | 1              | 3          | 59                       | 52             | 2              | 1350           | 567         | 46          | 2017        | 91.5                   | 97.3        | 96.4           | 97.3        | 2.4         |
| Pyrazinamide                   | 56                       | 4              | 7              | 0              | 0          | 67                       | 2              | 0              | 1867           | 100         | 0           | 1969        | 89.6                   | 99.9        | 89.6           | 99.9        | 0.0         |
| Streptomycin                   | 65                       | 1              | 4              | 0              | 3          | 73                       | 11             | 0              | 359            | 61          | 2           | 433         | 90.4                   | 97.5        | 94.3           | 97.4        | 1.0         |
| Ofloxacin                      | 15                       | 1              | 1              | 0              | 0          | 17                       | 3              | 0              | 82             | 34          | 0           | 119         | 94.1                   | 97.5        | 94.1           | 97.5        | 0.0         |
| Amikacin                       | 5                        | 0              | 0              | 0              | 0          | 5                        | 0              | 0              | 57             | 39          | 16          | 112         | 100.0                  | 100.0       | 100.0          | 100.0       | 13.7        |
| <b>Total</b>                   | <b>590</b>               | <b>15</b>      | <b>32</b>      | <b>1</b>       | <b>8</b>   | <b>646</b>               | <b>107</b>     | <b>7</b>       | <b>7149</b>    | <b>1019</b> | <b>81</b>   | <b>8363</b> | <b>93.7</b>            | <b>98.6</b> | <b>94.8</b>    | <b>98.6</b> | <b>1.0</b>  |
| <b>Other fluoroquinolones:</b> |                          |                |                |                |            |                          |                |                |                |             |             |             |                        |             |                |             |             |
| Ci: Ciprofloxacin              | 21                       | 1              | 0              | 0              | 1          | 23                       | 3              | 0              | 232            | 53          | 1           | 289         |                        |             |                |             |             |
| M: Moxifloxacin                | 15                       | 1              | 0              | 0              | 0          | 16                       | 4              | 0              | 83             | 34          | 0           | 121         |                        |             |                |             |             |
| <b>Other aminoglycosides:</b>  |                          |                |                |                |            |                          |                |                |                |             |             |             |                        |             |                |             |             |
| C: Capreomycin                 | 6                        | 0              | 1              | 0              | 0          | 7                        | 0              | 0              | 54             | 36          | 14          | 104         |                        |             |                |             |             |
| K: Kanamycin                   | 9                        | 0              | 0              | 0              | 0          | 9                        | 0              | 0              | 48             | 38          | 15          | 101         |                        |             |                |             |             |
| <b>Validation-set</b>          |                          |                |                |                |            |                          |                |                |                |             |             |             |                        |             |                |             |             |
| Isoniazid                      | 305                      | 5              | 18             | 1              | 35         | 364                      | 19             | 0              | 1,065          | 52          | 52          | 1188        | 85.2                   | 98.4        | 94.2           | 98.3        | 5.6         |
| Rifampicin                     | 263                      | 12             | 8              | 1              | 16         | 300                      | 9              | 1              | 1,200          | 4           | 38          | 1252        | 91.7                   | 99.2        | 96.8           | 99.2        | 3.5         |
| Ethambutol                     | 152                      | 6              | 7              | 1              | 26         | 192                      | 62             | 5              | 1003           | 79          | 210         | 1359        | 82.3                   | 95.1        | 95.2           | 94.2        | 15.2        |
| Pyrazinamide                   | 31                       | 12             | 27             | 5              | 104        | 179                      | 2              | 0              | 1,218          | 67          | 83          | 1370        | 24.0                   | 99.9        | 57.3           | 99.8        | 12.1        |
| Streptomycin                   | 278                      | 6              | 6              | 9              | 49         | 348                      | 10             | 1              | 970            | 34          | 189         | 1204        | 81.6                   | 99.1        | 95.0           | 98.9        | 15.3        |
| Ofloxacin                      | 2                        | 3              | 4              | 2              | 0          | 11                       | 0              | 0              | 489            | 134         | 38          | 661         | 45.5                   | 100.0       | 45.5           | 100.0       | 5.7         |
| Amikacin                       | 36                       | 16             | 5              | 0              | 2          | 59                       | 1              | 2              | 427            | 38          | 140         | 608         | 88.1                   | 99.5        | 91.2           | 99.4        | 21.3        |
| <b>Total</b>                   | <b>1067</b>              | <b>60</b>      | <b>75</b>      | <b>19</b>      | <b>232</b> | <b>1453</b>              | <b>103</b>     | <b>9</b>       | <b>6372</b>    | <b>408</b>  | <b>750</b>  | <b>7642</b> | <b>77.6</b>            | <b>98.5</b> | <b>92.3</b>    | <b>98.4</b> | <b>10.8</b> |
| <b>Other fluoroquinolones:</b> |                          |                |                |                |            |                          |                |                |                |             |             |             |                        |             |                |             |             |
| Ci: Ciprofloxacin              | 0                        | 0              | 0              | 0              | 0          | 0                        | 0              | 0              | 1              | 0           | 0           | 1           |                        |             |                |             |             |
| M: Moxifloxacin                | 3                        | 0              | 2              | 3              | 0          | 8                        | 0              | 0              | 287            | 133         | 25          | 445         |                        |             |                |             |             |
| <b>Other aminoglycosides:</b>  |                          |                |                |                |            |                          |                |                |                |             |             |             |                        |             |                |             |             |
| C: Capreomycin                 | 31                       | 13             | 6              | 1              | 4          | 55                       | 6              | 4              | 428            | 37          | 140         | 615         |                        |             |                |             |             |
| K: Kanamycin                   | 3                        | 0              | 4              | 1              | 1          | 9                        | 0              | 0              | 263            | 50          | 129         | 442         |                        |             |                |             |             |



## S10

The performance of mutations characterised in the training-set as resistance-determinants when predicting phenotypes in the validation-set.

| Drug | Variant           | Phenotypically resistant      |                                               | Phenotypically sensitive      |                                               | Link to previous report in the literature |
|------|-------------------|-------------------------------|-----------------------------------------------|-------------------------------|-----------------------------------------------|-------------------------------------------|
|      |                   | <u>Resistance-determinant</u> | <u>Resistance-determinant as a mixed-call</u> | <u>Resistance-determinant</u> | <u>Resistance-determinant as a mixed-call</u> |                                           |
| INH  | ahpC_C-57T        | 1                             | 0                                             | 0                             | 0                                             | N/A                                       |
| INH  | fabG1_C-15T       | 32                            | 1                                             | 9                             | 0                                             | 10428945[uid]                             |
| INH  | fabG1_G-17T       | 2                             | 0                                             | 0                             | 0                                             | 14638486[uid]                             |
| INH  | fabG1_T-8C        | 5                             | 1                                             | 0                             | 0                                             | 15793126[uid]                             |
| INH  | inhA_I194T        | 3                             | 1                                             | 1                             | 0                                             | 16495272[uid]                             |
| INH  | inhA_I21T         | 1                             | 0                                             | 0                             | 0                                             | 14638486[uid]                             |
| INH  | inhA_S94A         | 0                             | 0                                             | 2                             | 0                                             | 10815738[uid]                             |
| INH  | katG_S315N        | 6                             | 0                                             | 0                             | 0                                             | 9210694[uid]                              |
| INH  | katG_S315T        | 271                           | 5                                             | 8                             | 0                                             | 8537659[uid]                              |
| INH  | katG_W191R        | 1                             | 0                                             | 0                             | 0                                             | 15793126[uid]                             |
| RIF  | rpoB_1396_insATTC | 0                             | 1                                             | 0                             | 0                                             | N/A                                       |
| RIF  | rpoB_D435F        | 1                             | 0                                             | 0                             | 0                                             | 16229229[uid]                             |
| RIF  | rpoB_D435V        | 9                             | 2                                             | 0                             | 0                                             | 15184414[uid]                             |
| RIF  | rpoB_H445D        | 8                             | 1                                             | 0                             | 0                                             | 14729930[uid]                             |
| RIF  | rpoB_H445N        | 0                             | 0                                             | 0                             | 1                                             | 14729930[uid]                             |
| RIF  | rpoB_H445R        | 2                             | 1                                             | 0                             | 0                                             | 9003625[uid]                              |
| RIF  | rpoB_H445Y        | 10                            | 5                                             | 1                             | 0                                             | 8027320[uid]                              |
| RIF  | rpoB_L452P        | 4                             | 0                                             | 3                             | 0                                             | 10921994[uid]                             |
| RIF  | rpoB_Q432K        | 0                             | 0                                             | 1                             | 0                                             | 8027320[uid]                              |
| RIF  | rpoB_S450L        | 224                           | 7                                             | 3                             | 0                                             | 15728936[uid]                             |
| RIF  | rpoB_S450W        | 3                             | 1                                             | 1                             | 0                                             | 7759399[uid]                              |
| RIF  | rpoB_V170F        | 1                             | 1                                             | 0                             | 0                                             | N/A                                       |
| EMB  | embB_D354A        | 2                             | 0                                             | 1                             | 0                                             | N/A                                       |
| EMB  | embB_G406A        | 3                             | 0                                             | 2                             | 0                                             | 10639358[uid]                             |
| EMB  | embB_G406D        | 3                             | 0                                             | 2                             | 1                                             | 10639358[uid]                             |
| EMB  | embB_G406S        | 1                             | 0                                             | 0                             | 0                                             | 10639358[uid]                             |
| EMB  | embB_H1002R       | 2                             | 0                                             | 1                             | 0                                             | 22646308[uid]**                           |
| EMB  | embB_M306I        | 38                            | 1                                             | 27                            | 2                                             | 9257740[uid]                              |
| EMB  | embB_M306V        | 94                            | 5                                             | 22                            | 4                                             | 9257740[uid]                              |
| EMB  | embB_Q497K        | 0                             | 0                                             | 2                             | 0                                             | 10639358[uid]                             |
| EMB  | embB_Q497R        | 9                             | 0                                             | 4                             | 0                                             | 10639358[uid]                             |
| PZA  | pncA_292_insAT    | 1                             | 0                                             | 0                             | 0                                             | N/A                                       |
| PZA  | pncA_494_delC     | 1                             | 0                                             | 0                             | 0                                             | N/A                                       |
| PZA  | pncA_A-11G        | 15                            | 5                                             | 1                             | 0                                             | 9056006[uid]                              |
| PZA  | pncA_C138R        | 0                             | 2                                             | 0                             | 0                                             | 25336456[uid]                             |

|     |               |     |    |   |   |               |
|-----|---------------|-----|----|---|---|---------------|
| PZA | pncA_C14R     | 2   | 1  | 0 | 0 | 9055989[uid]  |
| PZA | pncA_D136N    | 0   | 1  | 0 | 0 | 11641519[uid] |
| PZA | pncA_G97D     | 2   | 0  | 0 | 0 | 11083630[uid] |
| PZA | pncA_H57D     | 7   | 0  | 0 | 0 | 9056006[uid]  |
| PZA | pncA_Q141*    | 1   | 0  | 0 | 0 | 11641519[uid] |
| PZA | pncA_T-12C    | 0   | 1  | 0 | 0 | N/A           |
| PZA | pncA_V125G    | 2   | 2  | 0 | 0 | 18573039[uid] |
| PZA | pncA_V139L    | 0   | 1  | 0 | 0 | 11083630[uid] |
| PZA | rpsA_A440T    | 7   | 0  | 1 | 0 | N/A           |
| SM  | gidB_202_delG | 4   | 0  | 2 | 0 | N/A           |
| SM  | gidB_A134E    | 2   | 0  | 0 | 0 | 17238915[uid] |
| SM  | gidB_V65G     | 1   | 1  | 0 | 0 | N/A           |
| SM  | rpsL_K43R     | 229 | 3  | 7 | 1 | 7968530[uid]  |
| SM  | rpsL_K88R     | 16  | 1  | 0 | 0 | 7934937[uid]  |
| SM  | rrs_A514C     | 19  | 2  | 0 | 0 | 22943573[uid] |
| SM  | rrs_C517T     | 6   | 1  | 2 | 0 | 15567277[uid] |
| CIP | .             | .   | .  | . | . |               |
| MOX | gyrA_D94A     | 1   | 0  | 0 | 0 | 8031045[uid]  |
| MOX | gyrA_D94G     | 2   | 0  | 0 | 0 | 8031045[uid]  |
| OFX | gyrA_A90V     | 0   | 2  | 0 | 0 | 8031045[uid]  |
| OFX | gyrA_D94G     | 2   | 3  | 0 | 0 | 8031045[uid]  |
| AK  | rrs_A1401G    | 36  | 16 | 1 | 2 | 8971706[uid]  |
| CAP | rrs_A1401G    | 31  | 13 | 6 | 4 | N/A           |
| KAN | rrs_A1401G    | 3   | 0  | 0 | 0 | N/A           |

## S11

### Susceptible phenotypes predicted resistant in the validation-set

| Isolate                       | Drug | Resistance-determinant |
|-------------------------------|------|------------------------|
| ERR551030                     | EMB  | embB_D354A             |
| ERR551894,ERR551895           | EMB  | embB_G406A             |
| ERR551634,ERR551635           | EMB  | embB_G406A             |
| ERR551952,ERR551951           | EMB  | embB_G406D             |
| ERR552080,ERR552079           | EMB  | embB_G406D             |
| ERR551409,ERR551410           | EMB  | embB_G406D             |
| ERR551910,ERR551909           | EMB  | embB_H1002R            |
| SAMN03649008                  | EMB  | embB_M306I             |
| ERR552413,ERR552412           | EMB  | embB_M306I             |
| SAMN03648591                  | EMB  | embB_M306I             |
| ERR552940,ERR552939           | EMB  | embB_M306I             |
| ERR552611,ERR552610           | EMB  | embB_M306I             |
| ERR551828,ERR551829           | EMB  | embB_M306I             |
| SAMN03648978                  | EMB  | embB_M306I             |
| ERR552298,ERR552297           | EMB  | embB_M306I             |
| ERR552106,ERR552105           | EMB  | embB_M306I             |
| ERR551266                     | EMB  | embB_M306I             |
| SAMN03649022                  | EMB  | embB_M306I             |
| ERR550897,ERR550896           | EMB  | embB_M306I             |
| ERR552068,ERR552067           | EMB  | embB_M306I             |
| ERR551771,ERR551770           | EMB  | embB_M306I             |
| ERR552398,ERR552399           | EMB  | embB_M306I             |
| ERR551660,ERR551659           | EMB  | embB_M306I             |
| ERR552603,ERR552604           | EMB  | embB_M306I             |
| SAMN03648845                  | EMB  | embB_M306I             |
| ERR552931,ERR552932           | EMB  | embB_M306I             |
| ERR551816,ERR551815           | EMB  | embB_M306I             |
| ERR552433,ERR552434           | EMB  | embB_M306I             |
| ERR552677                     | EMB  | embB_M306I             |
| ERR551645,ERR551644           | EMB  | embB_M306I             |
| SAMN03648802                  | EMB  | embB_M306I             |
| ERR552373,ERR552374           | EMB  | embB_M306I             |
| ERR552363,ERR552362,ERR552364 | EMB  | embB_M306I             |
| ERR550748,ERR550749           | EMB  | embB_M306I             |
| ERR551108,ERR551109           | EMB  | embB_M306I             |
| ERR550928,ERR550929           | EMB  | embB_M306I             |

|                               |     |             |
|-------------------------------|-----|-------------|
| ERR551377,ERR551379,ERR551378 | EMB | embB_M306V  |
| ERR552226,ERR552225           | EMB | embB_M306V  |
| SAMN03649010                  | EMB | embB_M306V  |
| ERR550770,ERR550771           | EMB | embB_M306V  |
| ERR553196                     | EMB | embB_M306V  |
| ERR552559,ERR552561,ERR552560 | EMB | embB_M306V  |
| ERR552080,ERR552079           | EMB | embB_M306V  |
| ERR551745,ERR551744,ERR551743 | EMB | embB_M306V  |
| ERR552950,ERR552951           | EMB | embB_M306V  |
| ERR551862,ERR551861           | EMB | embB_M306V  |
| ERR551667,ERR551668           | EMB | embB_M306V  |
| ERR550764                     | EMB | embB_M306V  |
| ERR552200,ERR552199           | EMB | embB_M306V  |
| ERR552872,ERR552873,ERR552874 | EMB | embB_M306V  |
| ERR551142,ERR551141           | EMB | embB_M306V  |
| ERR553246,ERR553247           | EMB | embB_M306V  |
| ERR551643,ERR551642           | EMB | embB_M306V  |
| ERR551798,ERR551797           | EMB | embB_M306V  |
| ERR551985,ERR551984           | EMB | embB_M306V  |
| SAMN03648988                  | EMB | embB_M306V  |
| ERR553098,ERR553097           | EMB | embB_M306V  |
| ERR552033,ERR552032           | EMB | embB_M306V  |
| ERR551437,ERR551436           | EMB | embB_M306V  |
| ERR553192,ERR553191           | EMB | embB_M306V  |
| ERR551464,ERR551465           | EMB | embB_M306V  |
| ERR552164,ERR552165           | EMB | embB_M306V  |
| SAMN03648554                  | EMB | embB_Q497K  |
| ERR552091                     | EMB | embB_Q497K  |
| ERR552326                     | EMB | embB_Q497R  |
| ERR551251,ERR551250           | EMB | embB_Q497R  |
| ERR552443,ERR552442           | EMB | embB_Q497R  |
| ERR552580                     | EMB | embB_Q497R  |
| SAMN03648823                  | INH | fabG1_C-15T |
| ERR551893                     | INH | fabG1_C-15T |
| ERR550956                     | INH | fabG1_C-15T |
| ERR550825                     | INH | fabG1_C-15T |
| SAMN03648742                  | INH | fabG1_C-15T |
| ERR551538                     | INH | fabG1_C-15T |
| ERR552371                     | INH | fabG1_C-15T |
| SAMN03648901                  | INH | fabG1_C-15T |
| SAMN03648707                  | INH | fabG1_C-15T |

|                               |     |               |
|-------------------------------|-----|---------------|
| ERR550943                     | SM  | gidB_202_delG |
| ERR552264                     | SM  | gidB_202_delG |
| ERR551538                     | INH | inhA_I194T    |
| ERR551632                     | INH | inhA_S94A     |
| SAMN03648620                  | INH | inhA_S94A     |
| ERR552831                     | INH | katG_S315T    |
| SAMN03648727                  | INH | katG_S315T    |
| ERR551327                     | INH | katG_S315T    |
| ERR553196                     | INH | katG_S315T    |
| ERR552694                     | INH | katG_S315T    |
| SAMN03648562                  | INH | katG_S315T    |
| ERR553262                     | INH | katG_S315T    |
| ERR551232                     | INH | katG_S315T    |
| ERR552301,ERR552302           | PZA | pncA_A-11G    |
| SAMN03648779                  | RIF | rpoB_H445N    |
| ERR552872,ERR552873,ERR552874 | RIF | rpoB_H445Y    |
| SAMN03648786                  | RIF | rpoB_L452P    |
| SAMN03648884                  | RIF | rpoB_L452P    |
| ERR552539                     | RIF | rpoB_L452P    |
| SAMN03648559                  | RIF | rpoB_Q432K    |
| SAMN03649015                  | RIF | rpoB_S450L    |
| ERR553196                     | RIF | rpoB_S450L    |
| SAMN03648974                  | RIF | rpoB_S450L    |
| ERR550793                     | RIF | rpoB_S450W    |
| ERR552130                     | SM  | rpsL_K43R     |
| ERR553196                     | SM  | rpsL_K43R     |
| ERR552683                     | SM  | rpsL_K43R     |
| ERR552892                     | SM  | rpsL_K43R     |
| ERR551859                     | SM  | rpsL_K43R     |
| ERR551119                     | SM  | rpsL_K43R     |
| SAMN03648559                  | SM  | rpsL_K43R     |
| ERR551232                     | SM  | rpsL_K43R     |
| ERR550773,ERR550772           | AK  | rrs_A1401G    |
| ERR552148,ERR552147           | AK  | rrs_A1401G    |

|                               |    |            |
|-------------------------------|----|------------|
| ERR552872,ERR552873,ERR552874 | AK | rrs_A1401G |
| SAMN03649053                  | SM | rrs_C517T  |
| ERR553196                     | SM | rrs_C517T  |

## S12

Comparison on derived training-set mutations to the *in silico* performance of line-probe assay (LPA) based mutations. Results are shown for the LPA mutations, then for the derived mutations (for the same drugs), and then for the combined mutations from the LPAs and the training-set. Genotypic predictions based on: R (resistance-determinant); Rx (resistance-determinant as a mixed base-call); S0 (zero mutations present); Ss (only benign mutations present); U (uncharacterised mutations present). Weighted mean sensitivity and specificity presented for a subset of drugs to avoid double counting. Ofloxacin and amikacin were included as representatives of their antibiotic classes as these had more resistant phenotypes than their related drugs. Pyrazinamide excluded for line-probe comparison as no line-probe assay exists for pyrazinamide (see below).

Results for line-probe assay alleles

|              | Phenotypically Resistant |                |                |                |          | Phenotypically Sensitive |            |                |                |                | All      | Excluding Unclassified |             |             |
|--------------|--------------------------|----------------|----------------|----------------|----------|--------------------------|------------|----------------|----------------|----------------|----------|------------------------|-------------|-------------|
|              | Genotype                 |                |                |                |          | Genotype                 |            |                |                |                |          |                        |             |             |
|              | R                        | R <sub>x</sub> | S <sub>0</sub> | S <sub>s</sub> | U        | Total                    | R          | R <sub>x</sub> | S <sub>0</sub> | S <sub>s</sub> | U        | Total                  | Sensitivity | Specificity |
| Isoniazid    | 304                      | 5              | 0              | 55             | 0        | 364                      | 17         | 0              | 0              | 1171           | 0        | 1188                   | 84.9        | 98.6        |
| Rifampicin   | 272                      | 14             | 0              | 14             | 0        | 300                      | 33         | 0              | 0              | 1219           | 0        | 1252                   | 95.3        | 97.4        |
| Ethambutol   | 132                      | 6              | 0              | 54             | 0        | 192                      | 53         | 6              | 0              | 1300           | 0        | 1359                   | 71.9        | 95.7        |
| Streptomycin | 246                      | 2              | 0              | 100            | 0        | 348                      | 7          | 1              | 0              | 1196           | 0        | 1204                   | 71.3        | 99.3        |
| Ofloxacin    | 3                        | 3              | 0              | 5              | 0        | 11                       | 5          | 0              | 0              | 656            | 0        | 661                    | 54.5        | 99.2        |
| Amikacin     | 37                       | 16             | 0              | 6              | 0        | 59                       | 2          | 2              | 0              | 604            | 0        | 608                    | 89.8        | 99.3        |
| <b>Total</b> | <b>994</b>               | <b>46</b>      | <b>0</b>       | <b>234</b>     | <b>0</b> | <b>1274</b>              | <b>117</b> | <b>9</b>       | <b>0</b>       | <b>6146</b>    | <b>0</b> | <b>6272</b>            | <b>81.6</b> | <b>98.0</b> |

Results for training-set

|              |             |           |           |           |            |             |            |          |             |            |            |             |             |             |             |             |
|--------------|-------------|-----------|-----------|-----------|------------|-------------|------------|----------|-------------|------------|------------|-------------|-------------|-------------|-------------|-------------|
| Isoniazid    | 305         | 5         | 18        | 1         | 35         | 364         | 19         | 0        | 1,065       | 52         | 52         | 1188        | 85.2        | 98.4        | 94.2        | 98.3        |
| Rifampicin   | 263         | 12        | 8         | 1         | 16         | 300         | 9          | 1        | 1,200       | 4          | 38         | 1252        | 91.7        | 99.2        | 96.8        | 99.2        |
| Ethambutol   | 152         | 6         | 7         | 1         | 26         | 192         | 62         | 5        | 1,003       | 79         | 210        | 1359        | 82.3        | 95.1        | 95.2        | 94.2        |
| Streptomycin | 278         | 6         | 6         | 9         | 49         | 348         | 10         | 1        | 970         | 34         | 189        | 1204        | 81.6        | 99.1        | 95.0        | 98.9        |
| Ofloxacin    | 2           | 3         | 4         | 2         | 0          | 11          | 0          | 0        | 489         | 134        | 38         | 661         | 45.5        | 100.0       | 45.5        | 100.0       |
| Amikacin     | 36          | 16        | 5         | 0         | 2          | 59          | 1          | 2        | 427         | 38         | 140        | 608         | 88.1        | 99.5        | 91.2        | 99.4        |
| <b>Total</b> | <b>1036</b> | <b>48</b> | <b>48</b> | <b>14</b> | <b>128</b> | <b>1274</b> | <b>101</b> | <b>9</b> | <b>5154</b> | <b>341</b> | <b>667</b> | <b>6272</b> | <b>85.1</b> | <b>98.2</b> | <b>94.6</b> | <b>98.0</b> |

Results for combined alleles from training-set and line-probe assays

|              |             |           |           |           |            |             |            |           |             |            |            |             |                         |             |             |             |      |
|--------------|-------------|-----------|-----------|-----------|------------|-------------|------------|-----------|-------------|------------|------------|-------------|-------------------------|-------------|-------------|-------------|------|
| Isoniazid    | 306         | 5         | 18        | 1         | 34         | 364         | 19         | 0         | 1,065       | 52         | 52         | 1188        | 85.4                    | 98.4        | 94.2        | 98.3        |      |
| Rifampicin   | 273         | 13        | 8         | 0         | 6          | 300         | 12         | 3         | 1,200       | 2          | 35         | 1252        | 95.3                    | 98.8        | 97.3        | 98.8        |      |
| Ethambutol   | 152         | 6         | 7         | 1         | 26         | 192         | 65         | 6         | 1,003       | 77         | 208        | 1359        | 82.3                    | 94.8        | 95.2        | 93.8        |      |
| Pyrazinamide | 31          | 12        | 27        | 5         | 104        | 179         | 2          | 0         | 1,218       | 67         | 83         | 1370        | 24.0                    | 99.9        | 57.3        | 99.8        |      |
| Streptomycin | 278         | 6         | 6         | 9         | 49         | 348         | 10         | 1         | 970         | 34         | 189        | 1204        | 81.6                    | 99.1        | 95.0        | 98.9        |      |
| Ofloxacin    | 3           | 3         | 4         | 1         | 0          | 11          | 0          | 0         | 489         | 134        | 38         | 661         | 54.5                    | 100.0       | 54.5        | 100.0       |      |
| Amikacin     | 37          | 16        | 5         | 0         | 1          | 59          | 2          | 2         | 427         | 38         | 139        | 608         | 89.8                    | 99.3        | 91.4        | 99.1        |      |
| <b>Total</b> | <b>1080</b> | <b>61</b> | <b>75</b> | <b>17</b> | <b>220</b> | <b>1453</b> | <b>110</b> | <b>12</b> | <b>6372</b> | <b>404</b> | <b>744</b> | <b>7642</b> | <b>78.5</b>             | <b>98.4</b> | <b>92.5</b> | <b>98.2</b> |      |
|              |             |           |           |           |            |             |            |           |             |            |            |             | Excluding pyrazinamide: | 86.2        | 98.1        | 94.8        | 97.9 |

### S13

Characterisation of mutations by the original training-set and by all 3651 samples.

| Previously seen in the literature | Characterisation in the training-set | Characterisation in the final, combined set of 3651 | Which isolates was the final characterisation based on? | Number of mutations |
|-----------------------------------|--------------------------------------|-----------------------------------------------------|---------------------------------------------------------|---------------------|
| No                                | Mutation not seen                    | Resistance-determinant                              | Validation-set                                          | 71                  |
| Yes                               | Mutation not seen                    | Resistance-determinant                              | Validation-set                                          | 26                  |
| No                                | Mutation not seen                    | Benign                                              | Validation-set                                          | 872                 |
| Yes                               | Mutation not seen                    | Benign                                              | Validation-set                                          | 14                  |
| No                                | Mutation not seen                    | Uncharacterised                                     | Validation-set                                          | 528                 |
| Yes                               | Mutation not seen                    | Uncharacterised                                     | Validation-set                                          | 8                   |
| No                                | Resistance-determinant               | Resistance-determinant                              | Training-set                                            | 30                  |
| Yes                               | Resistance-determinant               | Resistance-determinant                              | Training-set                                            | 30                  |
| No                                | Resistance-determinant               | Resistance-determinant                              | Combined sets                                           | 8                   |
| Yes                               | Resistance-determinant               | Resistance-determinant                              | Combined sets                                           | 48                  |
| No                                | Resistance-determinant               | Benign                                              | Combined sets                                           | 2                   |
| No                                | Resistance-determinant               | Uncharacterised                                     | Training-set                                            | 1                   |
| Yes                               | Resistance-determinant               | Uncharacterised                                     | Training-set                                            | 1                   |
| No                                | Benign                               | Resistance-determinant                              | Combined sets                                           | 9                   |
| Yes                               | Benign                               | Resistance-determinant                              | Combined sets                                           | 7                   |
| No                                | Benign                               | Benign                                              | Training-set                                            | 607                 |
| Yes                               | Benign                               | Benign                                              | Training-set                                            | 13                  |
| No                                | Benign                               | Benign                                              | Combined sets                                           | 113                 |
| Yes                               | Benign                               | Benign                                              | Combined sets                                           | 11                  |
| No                                | Benign                               | Uncharacterised                                     | Combined sets                                           | 12                  |
| No                                | Uncharacterised                      | Resistance-determinant                              | Combined sets                                           | 2                   |
| Yes                               | Uncharacterised                      | Resistance-determinant                              | Combined sets                                           | 1                   |
| No                                | Uncharacterised                      | Benign                                              | Combined sets                                           | 2                   |
| Yes                               | Uncharacterised                      | Benign                                              | Combined sets                                           | 1                   |
| No                                | Uncharacterised                      | Uncharacterised                                     | Training-set                                            | 57                  |
| Yes                               | Uncharacterised                      | Uncharacterised                                     | Training-set                                            | 9                   |
| No                                | Uncharacterised                      | Uncharacterised                                     | Combined sets                                           | 24                  |
| Yes                               | Uncharacterised                      | Uncharacterised                                     | Combined sets                                           | 5                   |



## S14

Resistance-determinants algorithmically derived from the 3651 isolates

| Mutation               | Drug | Resistant | Susceptible |
|------------------------|------|-----------|-------------|
| ahpC_C-57T             | INH  | 2         | 0           |
| ahpC_C-72T             | INH  | 1         | 1           |
| eis_G-10A              | KAN  | 4         | 0           |
| embA_C-12T             | EMB  | 12        | 7           |
| embA_C-16G             | EMB  | 5         | 1           |
| embA_C-16T             | EMB  | 6         | 4           |
| embB_D328Y             | EMB  | 2         | 1           |
| embB_D354A             | EMB  | 3         | 2           |
| embB_G406A             | EMB  | 4         | 5           |
| embB_G406D             | EMB  | 5         | 5           |
| embB_G406S             | EMB  | 4         | 5           |
| embB_M306I             | EMB  | 59        | 63          |
| embB_M306V             | EMB  | 117       | 29          |
| embB_N1033K            | EMB  | 1         | 0           |
| embB_Q497K             | EMB  | 1         | 4           |
| embB_Q497R             | EMB  | 17        | 8           |
| fabG1_C-15T            | INH  | 106       | 15          |
| fabG1_G-17T            | INH  | 7         | 1           |
| fabG1_T-8C             | INH  | 9         | 3           |
| gidB_141_delC          | SM   | 1         | 0           |
| gidB_202_delG          | SM   | 8         | 9           |
| gidB_202_insGC         | SM   | 1         | 1           |
| gidB_215_delC          | SM   | 6         | 3           |
| gidB_399_delAAACTCGGTG | CAP  | 1         | 0           |
| gidB_399_delAAACTCGGTG | SM   | 1         | 0           |
| gidB_451_delG          | SM   | 4         | 4           |
| gidB_451_insGC         | SM   | 1         | 2           |
| gidB_A134E             | SM   | 3         | 0           |
| gidB_A138T             | SM   | 1         | 0           |
| gidB_A138V             | SM   | 2         | 1           |
| gidB_A19P              | SM   | 1         | 2           |
| gidB_A200E             | SM   | 2         | 0           |
| gidB_A205E             | SM   | 1         | 0           |
| gidB_A80P              | SM   | 1         | 0           |
| gidB_C52F              | SM   | 1         | 0           |
| gidB_D85A              | SM   | 3         | 0           |
| gidB_E173*             | SM   | 1         | 0           |
| gidB_G117V             | SM   | 2         | 0           |
| gidB_G30D              | SM   | 4         | 0           |
| gidB_G34V              | SM   | 2         | 0           |
| gidB_G69D              | SM   | 3         | 0           |
| gidB_G73A              | SM   | 1         | 0           |

|                |     |    |    |
|----------------|-----|----|----|
| gidB_H48N      | SM  | 2  | 0  |
| gidB_H48Q      | SM  | 1  | 0  |
| gidB_I11N      | SM  | 1  | 0  |
| gidB_I162S     | SM  | 1  | 0  |
| gidB_L26F      | SM  | 1  | 0  |
| gidB_L79S      | SM  | 5  | 2  |
| gidB_L79W      | SM  | 1  | 0  |
| gidB_L91P      | SM  | 1  | 0  |
| gidB_P75L      | SM  | 1  | 1  |
| gidB_P75R      | SM  | 5  | 0  |
| gidB_P93L      | SM  | 1  | 0  |
| gidB_Q125*     | SM  | 1  | 0  |
| gidB_R118L     | SM  | 1  | 0  |
| gidB_R118S     | SM  | 3  | 1  |
| gidB_R137P     | SM  | 2  | 1  |
| gidB_R137W     | SM  | 1  | 1  |
| gidB_R47W      | SM  | 1  | 0  |
| gidB_R64W      | SM  | 1  | 0  |
| gidB_R83P      | SM  | 1  | 0  |
| gidB_S136*     | SM  | 1  | 1  |
| gidB_S149R     | SM  | 1  | 2  |
| gidB_S70N      | SM  | 1  | 0  |
| gidB_V203L     | SM  | 1  | 0  |
| gidB_V41I      | SM  | 1  | 1  |
| gidB_V65G      | SM  | 3  | 0  |
| gidB_V88A      | SM  | 2  | 0  |
| gidB_Y195H     | CAP | 2  | 28 |
| gyrA_A74S      | CIP | 2  | 0  |
| gyrA_A90V      | MOX | 2  | 0  |
| gyrA_A90V      | OFX | 4  | 0  |
| gyrA_D94A      | MOX | 2  | 0  |
| gyrA_D94A      | OFX | 1  | 0  |
| gyrA_D94G      | CIP | 18 | 1  |
| gyrA_D94G      | MOX | 11 | 4  |
| gyrA_D94G      | OFX | 14 | 3  |
| gyrA_D94H      | MOX | 1  | 1  |
| gyrA_D94H      | OFX | 1  | 1  |
| gyrA_D94N      | MOX | 1  | 0  |
| gyrA_D94N      | OFX | 1  | 0  |
| gyrA_S91P      | CIP | 2  | 2  |
| gyrA_S91P      | MOX | 3  | 0  |
| gyrA_S91P      | OFX | 3  | 0  |
| inhA_I194T     | INH | 6  | 1  |
| inhA_I21T      | INH | 3  | 0  |
| inhA_S94A      | INH | 4  | 3  |
| katG_1157_delT | INH | 1  | 0  |

|                         |     |     |   |
|-------------------------|-----|-----|---|
| katG_121_insTA          | INH | 1   | 0 |
| katG_1388_delA          | INH | 2   | 0 |
| katG_1450_delC          | INH | 1   | 0 |
| katG_1465_delC          | INH | 1   | 0 |
| katG_1910_delA          | INH | 1   | 0 |
| katG_471_delG           | INH | 2   | 0 |
| katG_A109V              | INH | 1   | 0 |
| katG_A614E              | INH | 1   | 0 |
| katG_D142G              | INH | 1   | 0 |
| katG_G125D              | INH | 1   | 0 |
| katG_G182R              | INH | 1   | 0 |
| katG_G297V              | INH | 1   | 0 |
| katG_L141F              | INH | 3   | 0 |
| katG_L159P              | INH | 1   | 0 |
| katG_L627P              | INH | 1   | 0 |
| katG_L704S              | INH | 1   | 0 |
| katG_P232R              | INH | 1   | 0 |
| katG_R104Q              | INH | 2   | 0 |
| katG_S315I              | INH | 1   | 0 |
| katG_S315N              | INH | 8   | 1 |
| katG_S315T              | INH | 471 | 9 |
| katG_S481L              | INH | 1   | 1 |
| katG_S700P              | INH | 2   | 0 |
| katG_T180K              | INH | 1   | 0 |
| katG_V633A              | INH | 1   | 1 |
| katG_W191G              | INH | 1   | 0 |
| katG_W191R              | INH | 2   | 0 |
| katG_W300C              | INH | 1   | 0 |
| katG_W300S              | INH | 1   | 0 |
| katG_W328L              | INH | 1   | 0 |
| katG_W505*              | INH | 1   | 0 |
| katG_W90R               | INH | 1   | 0 |
| ndh_G225D               | INH | 1   | 0 |
| pncA_174_delG           | PZA | 1   | 0 |
| pncA_177_delC           | PZA | 1   | 0 |
| pncA_285_insCT          | PZA | 1   | 0 |
| pncA_292_insAT          | PZA | 2   | 0 |
| pncA_409_delT           | PZA | 2   | 0 |
| pncA_489_delC           | PZA | 9   | 0 |
| pncA_491_insACC         | PZA | 1   | 0 |
| pncA_494_delC           | PZA | 2   | 0 |
| pncA_528_insGGCCGTCTGGC | PZA | 1   | 0 |
| pncA_556_insTG          | PZA | 1   | 0 |
| pncA_563_insAC          | PZA | 1   | 0 |
| pncA_570_insCT          | PZA | 2   | 0 |
| pncA_592_delC           | PZA | 1   | 0 |

|                |     |    |    |
|----------------|-----|----|----|
| pncA_617_insTC | PZA | 1  | 0  |
| pncA_A-11G     | PZA | 23 | 1  |
| pncA_C138R     | PZA | 3  | 0  |
| pncA_C14R      | PZA | 4  | 0  |
| pncA_D12A      | PZA | 1  | 0  |
| pncA_D136N     | PZA | 2  | 2  |
| pncA_D49N      | PZA | 1  | 0  |
| pncA_D8G       | PZA | 1  | 0  |
| pncA_D8N       | PZA | 1  | 0  |
| pncA_F81V      | PZA | 1  | 1  |
| pncA_G132D     | PZA | 1  | 0  |
| pncA_G162D     | PZA | 1  | 0  |
| pncA_G78C      | PZA | 1  | 0  |
| pncA_G97C      | PZA | 1  | 0  |
| pncA_G97D      | PZA | 3  | 0  |
| pncA_G97R      | PZA | 1  | 0  |
| pncA_H137R     | PZA | 1  | 2  |
| pncA_H51Q      | PZA | 1  | 1  |
| pncA_H57D      | PZA | 18 | 0  |
| pncA_H57R      | PZA | 2  | 0  |
| pncA_H71Q      | PZA | 1  | 0  |
| pncA_H71Y      | PZA | 2  | 1  |
| pncA_I133T     | PZA | 20 | 15 |
| pncA_K48E      | PZA | 1  | 2  |
| pncA_K96T      | PZA | 1  | 0  |
| pncA_L151S     | PZA | 1  | 0  |
| pncA_L159V     | PZA | 1  | 1  |
| pncA_L172P     | PZA | 1  | 0  |
| pncA_L27P      | PZA | 1  | 0  |
| pncA_L4S       | PZA | 4  | 0  |
| pncA_M175V     | PZA | 1  | 1  |
| pncA_P54L      | PZA | 2  | 2  |
| pncA_P54Q      | PZA | 1  | 1  |
| pncA_Q10*      | PZA | 1  | 0  |
| pncA_Q10P      | PZA | 38 | 3  |
| pncA_Q141*     | PZA | 2  | 0  |
| pncA_Q141P     | PZA | 5  | 1  |
| pncA_S104G     | PZA | 1  | 1  |
| pncA_S104R     | PZA | 2  | 0  |
| pncA_S32I      | PZA | 1  | 0  |
| pncA_T-12C     | PZA | 4  | 0  |
| pncA_T114P     | PZA | 1  | 0  |
| pncA_T135P     | PZA | 1  | 0  |
| pncA_T47A      | PZA | 1  | 1  |
| pncA_V125G     | PZA | 8  | 0  |
| pncA_V139L     | PZA | 2  | 0  |

|                      |     |     |    |
|----------------------|-----|-----|----|
| pncA_V180F           | PZA | 1   | 0  |
| pncA_V180G           | PZA | 2   | 0  |
| pncA_V21G            | PZA | 2   | 1  |
| pncA_V7L             | PZA | 3   | 0  |
| pncA_W68C            | PZA | 1   | 0  |
| pncA_W68R            | PZA | 4   | 0  |
| pncA_Y99*            | PZA | 1   | 0  |
| rpoB_1377_delG       | RIF | 1   | 0  |
| rpoB_1392_insGCCA    | RIF | 2   | 0  |
| rpoB_1394_delC       | RIF | 1   | 0  |
| rpoB_1396_insATTC    | RIF | 3   | 0  |
| rpoB_1398_delT       | RIF | 1   | 0  |
| rpoB_1427_delTGGCCCC | RIF | 1   | 0  |
| rpoB_D435F           | RIF | 2   | 0  |
| rpoB_D435V           | RIF | 15  | 0  |
| rpoB_G981D           | RIF | 1   | 0  |
| rpoB_H445D           | RIF | 15  | 0  |
| rpoB_H445L           | RIF | 2   | 0  |
| rpoB_H445N           | RIF | 1   | 5  |
| rpoB_H445R           | RIF | 6   | 0  |
| rpoB_H445Y           | RIF | 27  | 1  |
| rpoB_I491F           | RIF | 4   | 19 |
| rpoB_L430P           | RIF | 3   | 4  |
| rpoB_L452P           | RIF | 8   | 7  |
| rpoB_M434I           | RIF | 1   | 0  |
| rpoB_Q432K           | RIF | 1   | 1  |
| rpoB_Q432L           | RIF | 1   | 0  |
| rpoB_Q432P           | RIF | 2   | 0  |
| rpoB_S441L           | RIF | 1   | 0  |
| rpoB_S450F           | RIF | 4   | 0  |
| rpoB_S450L           | RIF | 290 | 4  |
| rpoB_S450W           | RIF | 7   | 2  |
| rpoB_T676P           | RIF | 1   | 0  |
| rpoB_V170F           | RIF | 4   | 1  |
| rpoB_V359A           | RIF | 1   | 0  |
| rpsA_E67D            | PZA | 1   | 0  |
| rpsA_V260I           | PZA | 1   | 16 |
| rpsL_K43R            | SM  | 256 | 8  |
| rpsL_K88R            | SM  | 28  | 0  |
| rrs_A1325C           | SM  | 1   | 0  |
| rrs_A1401G           | AK  | 57  | 3  |
| rrs_A1401G           | CAP | 49  | 10 |
| rrs_A1401G           | KAN | 8   | 0  |
| rrs_A514C            | SM  | 23  | 0  |
| rrs_A514T            | SM  | 1   | 0  |
| rrs_C1402T           | AK  | 1   | 1  |

|            |     |   |   |
|------------|-----|---|---|
| rrs_C1402T | CAP | 2 | 1 |
| rrs_C513T  | SM  | 2 | 0 |
| rrs_C517T  | KAN | 1 | 5 |
| rrs_C517T  | SM  | 9 | 2 |
| rrs_C905A  | SM  | 1 | 0 |
| tlyA_C-83T | CAP | 1 | 0 |

## S15

Algorithm as applied to all 3651 isolates

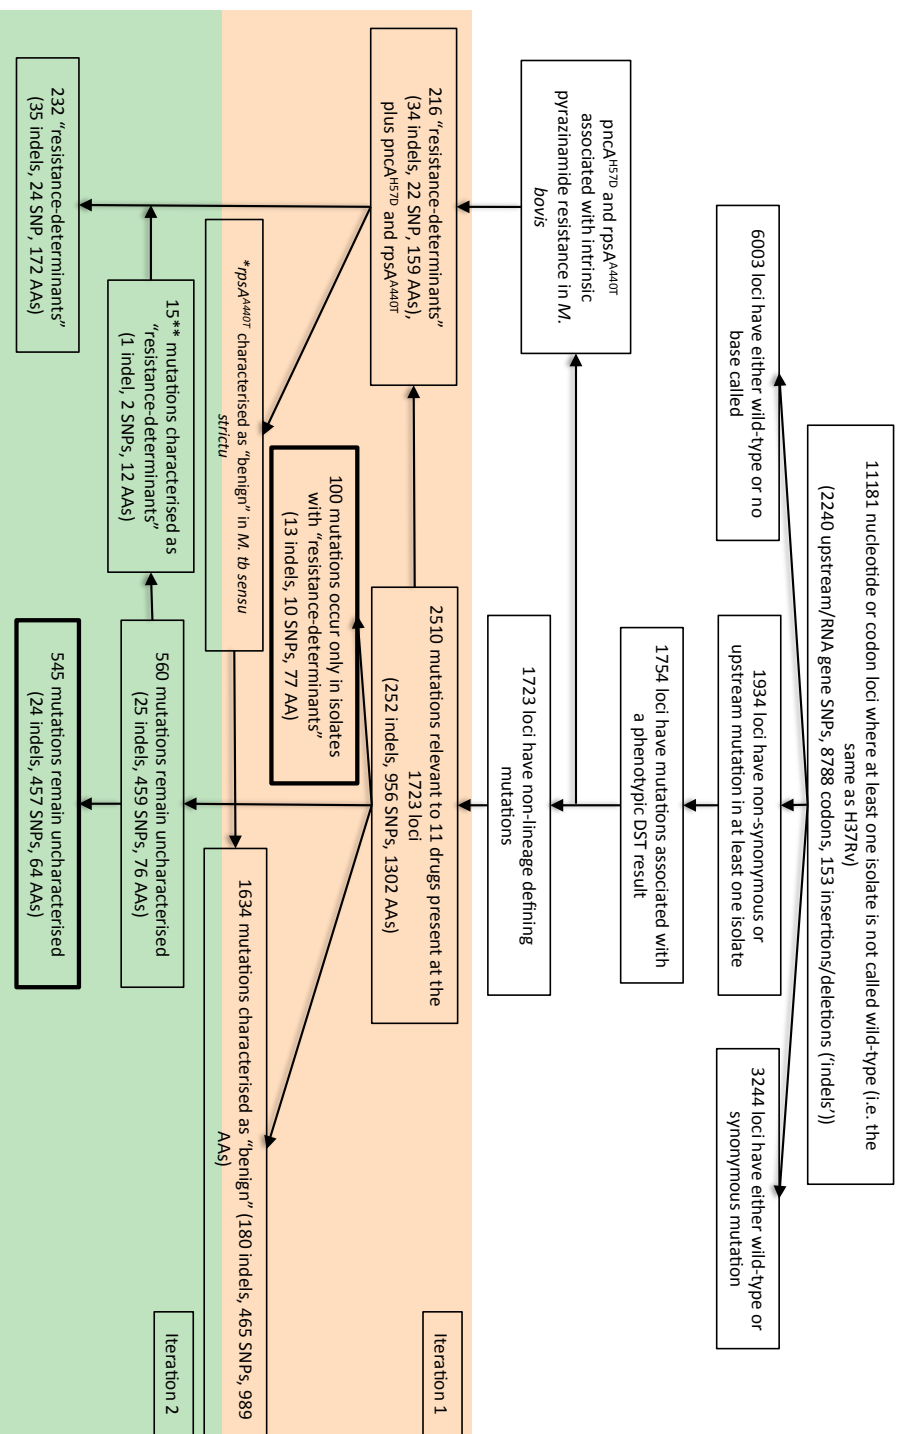

\*Although in the training-set *rpsA<sup>A440I</sup>* was identified as lineage-defining of *M. bovis*, which is intrinsically resistant to pyrazinamide, it is seen independently as a lone-standing (non- *M. bovis*) mutation in a pyrazinamide sensitive isolate in the validation-set, leading to its re-characterised as "benign", and leaving *pnCA<sup>H57D</sup>* as the remaining resistance-determinant for *M. bovis*. 645 mutations were left uncharacterised (highlighted in boxes in bold). \*\*Mutations occurring in phenotypically-resistant isolates with the other mutations defined as 'benign' in iteration 1.

**S16**

Phenotypic predictions for all 3651 isolates, based on mutations derived from applying the algorithm to the same 3651 isolates.

|                              | Phenotypically Resistant |                |                |                |           | Phenotypically Resistant |            |                |                |                | All         |              | Excluding Unclassified |             |             |             |
|------------------------------|--------------------------|----------------|----------------|----------------|-----------|--------------------------|------------|----------------|----------------|----------------|-------------|--------------|------------------------|-------------|-------------|-------------|
|                              | Genotype                 |                |                |                |           | Genotype                 |            |                |                |                | Sensitivity | Specificity  | Sensitivity            | Specificity |             |             |
|                              | R                        | R <sub>x</sub> | S <sub>0</sub> | S <sub>s</sub> | U         | Total                    | R          | R <sub>x</sub> | S <sub>0</sub> | S <sub>s</sub> |             |              |                        |             | U           | Total       |
| H: Isoniazid                 | 621                      | 12             | 36             | 0              | 10        | 679                      | 33         | 2              | 2,666          | 244            | 15          | 2960         | 93.2                   | 98.8        | 94.6        | 98.8        |
| R: Rifampicin                | 385                      | 14             | 9              | 0              | 2         | 410                      | 40         | 4              | 3,033          | 91             | 25          | 3193         | 97.3                   | 98.6        | 97.8        | 98.6        |
| E: Ethambutol                | 217                      | 10             | 8              | 0              | 16        | 251                      | 122        | 8              | 2,353          | 645            | 248         | 3376         | 90.4                   | 96.1        | 96.6        | 95.8        |
| Z: Pyrazinamide              | 187                      | 24             | 34             | 0              | 1         | 246                      | 47         | 5              | 3,085          | 196            | 6           | 3339         | 85.8                   | 98.4        | 86.1        | 98.4        |
| S: Streptomycin              | 397                      | 7              | 10             | 0              | 7         | 421                      | 40         | 1              | 1,329          | 127            | 140         | 1637         | 96.0                   | 97.5        | 97.6        | 97.3        |
| O: Ofloxacin                 | 18                       | 4              | 5              | 0              | 1         | 28                       | 4          | 0              | 571            | 120            | 85          | 780          | 78.6                   | 99.5        | 81.5        | 99.4        |
| A: Amikacin                  | 42                       | 16             | 5              | 0              | 1         | 64                       | 2          | 2              | 484            | 75             | 157         | 720          | 90.6                   | 99.4        | 92.1        | 99.3        |
| <b>Total</b>                 | <b>1867</b>              | <b>87</b>      | <b>107</b>     | <b>0</b>       | <b>38</b> | <b>2099</b>              | <b>288</b> | <b>22</b>      | <b>13521</b>   | <b>1498</b>    | <b>676</b>  | <b>16005</b> | <b>93.1</b>            | <b>98.1</b> | <b>94.8</b> | <b>98.0</b> |
| <b>Other quinolones</b>      |                          |                |                |                |           |                          |            |                |                |                |             |              |                        |             |             |             |
| Ci: Ciprofloxacin            | 21                       | 1              | 0              | 0              | 1         | 23                       | 3          | 0              | 233            | 42             | 12          | 290          |                        |             |             |             |
| M: Moxifloxacin              | 19                       | 1              | 2              | 0              | 2         | 24                       | 5          | 0              | 370            | 108            | 83          | 566          |                        |             |             |             |
| <b>Other aminoglycosides</b> |                          |                |                |                |           |                          |            |                |                |                |             |              |                        |             |             |             |
| C: Capreomycin               | 41                       | 13             | 7              | 0              | 1         | 62                       | 35         | 4              | 482            | 72             | 126         | 719          |                        |             |             |             |
| K: Kanamycin                 | 13                       | 0              | 4              | 0              | 1         | 18                       | 5          | 0              | 311            | 80             | 147         | 543          |                        |             |             |             |

Genotypic predictions for all phenotypes for all 3651 isolates. Genotypic predictions based on: R (resistance-determinant); Rx (resistance-determinant as a mixed base-call); S0 (zero mutations present); Ss (only benign mutations present); U (uncharacterised mutations present). Weighted mean sensitivity and specificity presented as both an overall figure and as that based on characterised mutations only (R, Rx, S0, Ss columns)



## S17

Homoplasmy rates vs. the proportion of phenotypic-resistance for mutations in the 23-candidate genes and the rest of the genome.

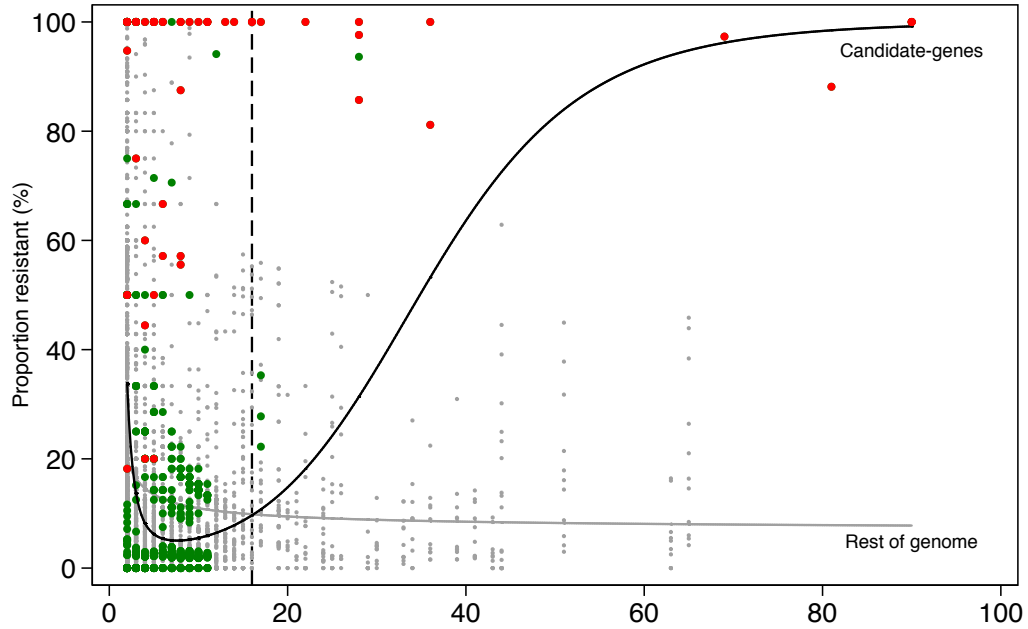

Mutations within the candidate-genes are shown as red (characterised as resistance-determinants) and green (others). Mutations in the rest of the genome are shown in grey. Curves represent the mean for mutations across candidate-genes and across the rest of the genome. The mutation  $\text{katG}^{\text{S315T}}$  emerged 180 times but has been set to 90, equal to the next most homoplastic mutation, to fit all data to the current scale. The proportion resistant has not been changed and shape of the curve of the mean for candidate-genes remains unaltered.

## References

1. Walker TM, Lalor MK, Broda A, Saldana Ortega L, Morgan M, Parker L, et al. Assessment of Mycobacterium tuberculosis transmission in Oxfordshire, UK, 2007-12, with whole pathogen genome sequences: an observational study. *The Lancet Respiratory Medicine*. 2014 Apr;2(4):285–92.
2. Walker TM, Ip CL, Harrell RH, Evans JT, Kapatai G, Dedicoat MJ, et al. Whole-genome sequencing to delineate Mycobacterium tuberculosis outbreaks: a retrospective observational study. *Lancet Infect Dis*. 2013 Feb;13(2):137–46.
3. Feuerriegel S, Oberhauser B, George A, Dfae F, Richter E, Rüsç-Gerdes S, et al. Sequence analysis for detection of first-line drug resistance in Mycobacterium tuberculosis strains from a high-incidence setting. *BMC Microbiol*. 2012 Jan 1;12(1):90–0.
4. Sandgren A, Strong M, Muthukrishnan P, Weiner BK, Church GM, Murray MB. Tuberculosis Drug Resistance Mutation Database. *Plos Med*. 2009;6(2):e2.
